# Supplementary material for: An Fe3O4 supported O-phenylenediamine based tetraaza Schiff base-Cu(ii) complex as a novel nanomagnetic catalytic system for synthesis of pyrano[2,3-c]pyrazoles
Source: Royal Society of Chemistry journal article supplement (doi:10.1039/d3na00906h), 2023-01-01
Supplement: d3na00906h1.pdf [file d3na00906h1.pdf]

**Fe<sub>3</sub>O<sub>4</sub> Supported O-Phenylenediamine Based Tetraaza (N<sub>4</sub> Donor) Schiff Base-Cu (II)  
Complex as A Novel Nanomagnetic Catalytic System for synthesis of Pyrano[2,3-  
c]pyrazoles**

Rehab Tahseen alhayo <sup>a</sup>, Ghufran Sh. Jassim <sup>b</sup>, Hasanain Amer Naji <sup>c</sup>, A.H. Shather <sup>d</sup>, Israa  
Habeeb Naser <sup>e</sup>, Luay Ali Khaleel <sup>f</sup>, Haider Abdulkareem Almashhadani <sup>g,\*</sup>

<sup>a</sup> Al-Farahidi University, Baghdad, Iraq.

<sup>b</sup> Department of Chemistry, College of Science, University of Anbar, Anbar, Iraq

<sup>c</sup> Faculty of pharmacy, Al-Turath University College, Baghdad, Iraq

<sup>d</sup> Department of computer engineering technology Al Kitab University, Altun Kopru, Kirkuk  
00964, Iraq.

<sup>e</sup> Medical Laboratories Techniques Department / AL-Mustaqbal University College, 51001  
Hillah, Babil, Iraq.

<sup>f</sup> Collage of Dentistry, National University of Science and Technology, Dhi Qar, Iraq.

<sup>g</sup> Chemistry Department, College of Science, University of Baghdad, Baghdad, Iraq

**Corresponding author \*Email:** [haider.200690@gmail.com](mailto:haider.200690@gmail.com) & [h\\_r200690@yahoo.com](mailto:h_r200690@yahoo.com)

**Copies of by <sup>1</sup>H and <sup>13</sup>C NMR spectra:**

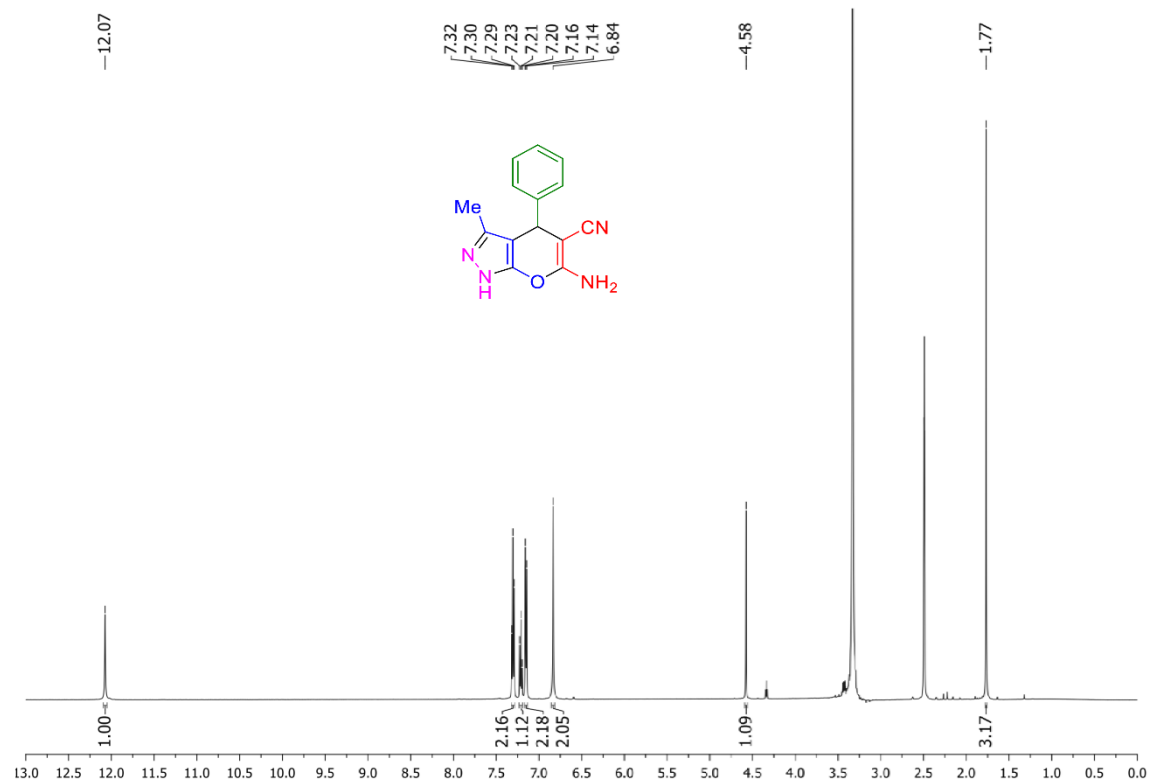

**Figure S1.** <sup>1</sup>H NMR spectra of 6-Amino-3-methyl-4-phenyl-2,4-dihydropyrano[2,3-c]pyrazole-5-carbonitrile.

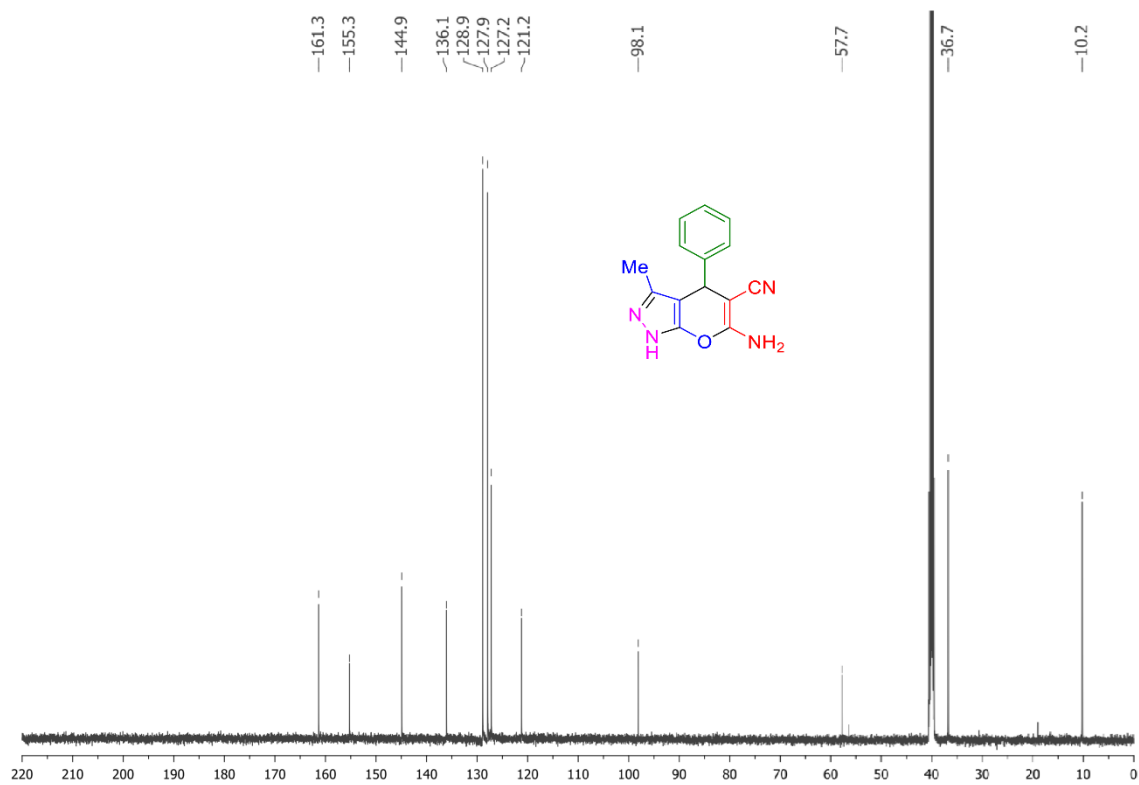

**Figure S2.**  $^{13}\text{C}$  NMR spectra of 6-Amino-3-methyl-4-phenyl-2,4-dihydroprano[2,3-c]pyrazole-5-carbonitrile.

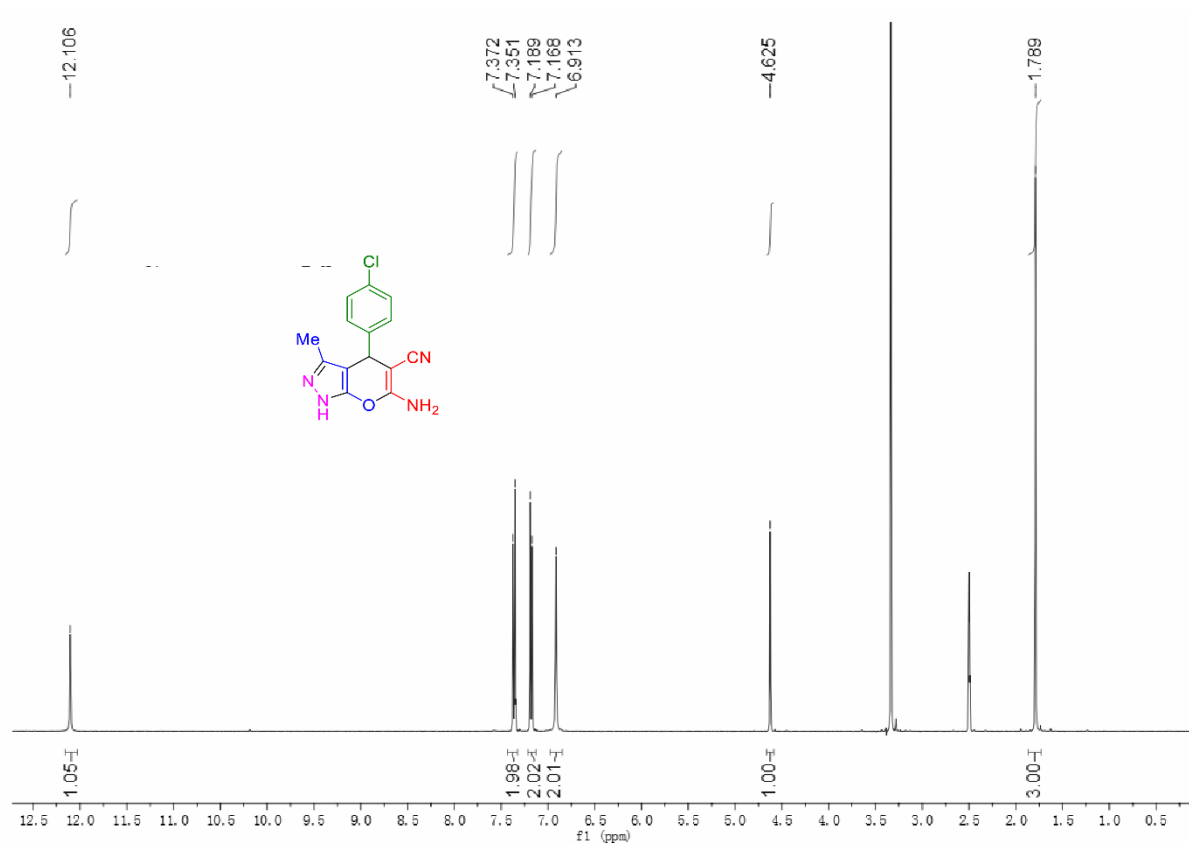

**Figure S3.** <sup>1</sup>H NMR spectra of 6-Amino-4-(4-chlorophenyl)-3-methyl-1,4-dihydropyrano[2,3-c]pyrazole-5-carbonitrile.

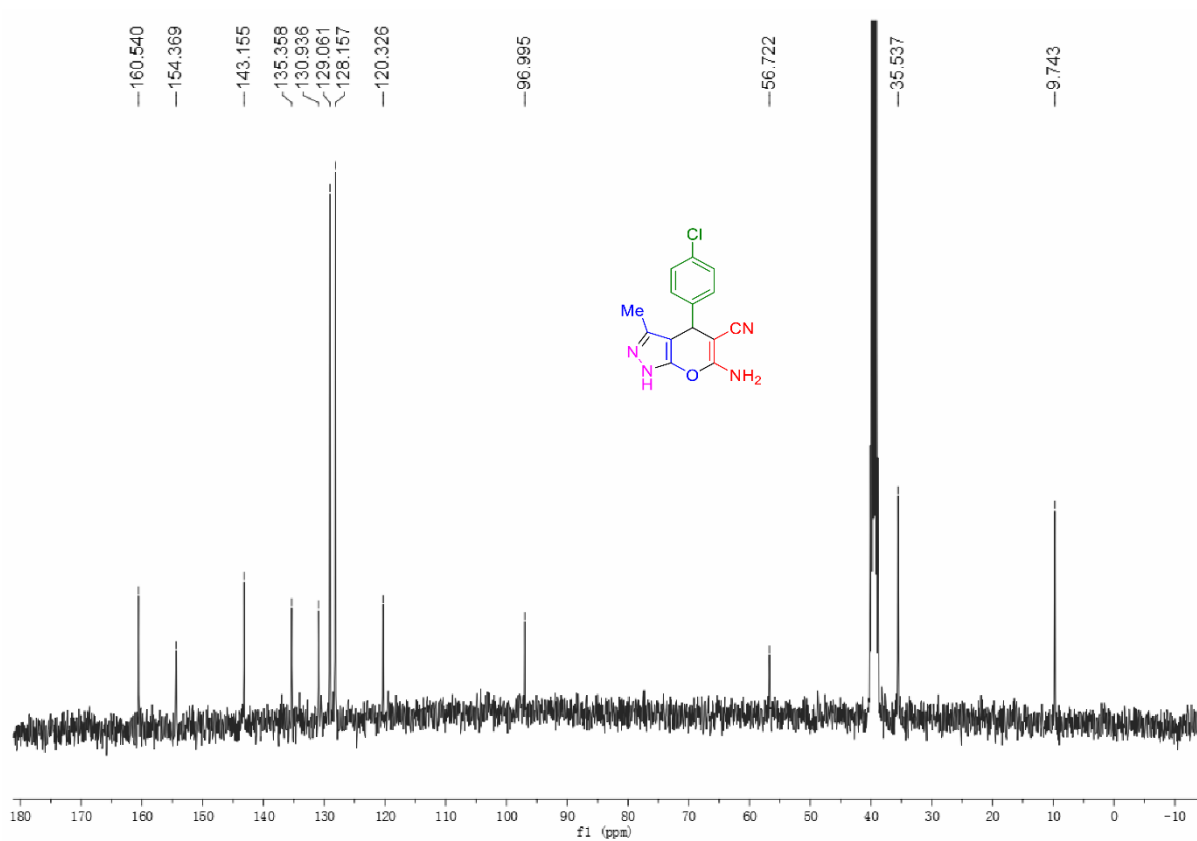

**Figure S4.**  $^{13}\text{C}$  NMR spectra of 6-Amino-4-(4-chlorophenyl)-3-methyl-1,4-dihydropyrano[2,3-c]pyrazole-5-carbonitrile.

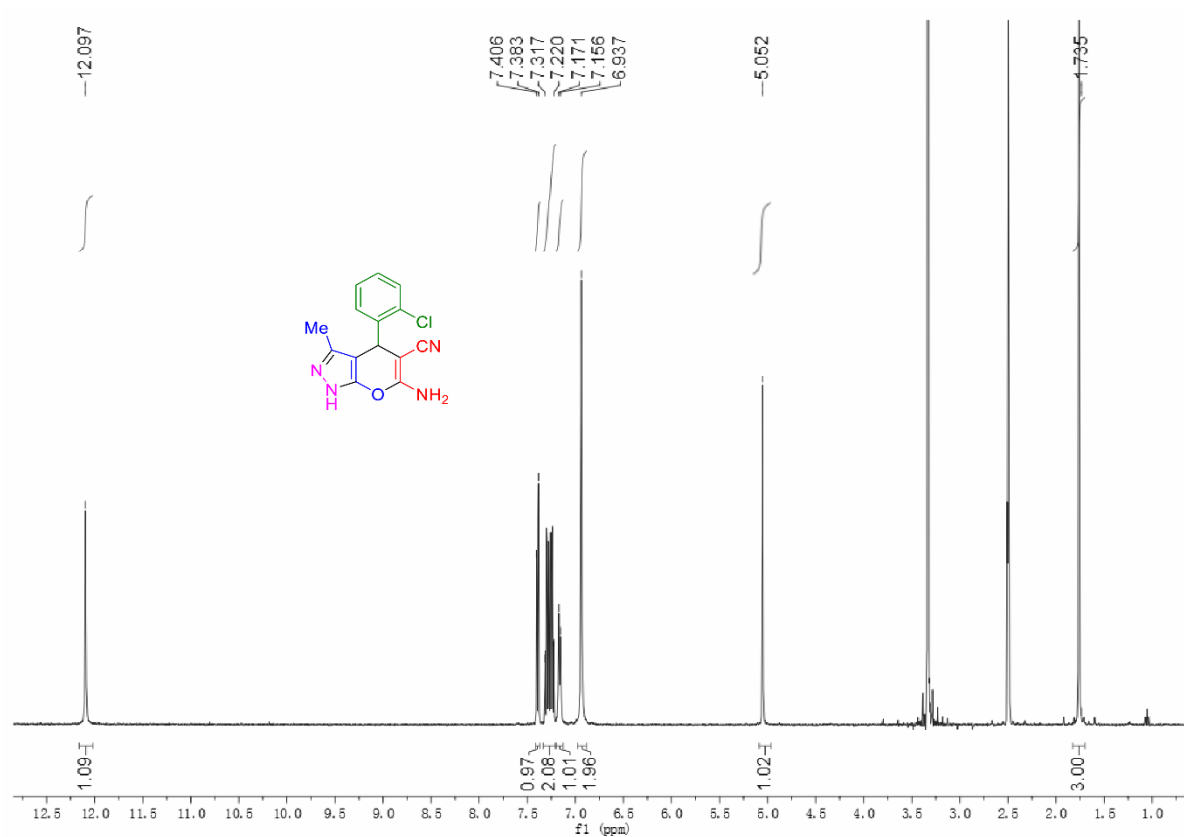

**Figure S5.** <sup>1</sup>H NMR spectra of 6-Amino-4-(2-chlorophenyl)-3-methyl-1,4-dihydropyrano[2,3-c]pyrazole-5-carbonitrile.

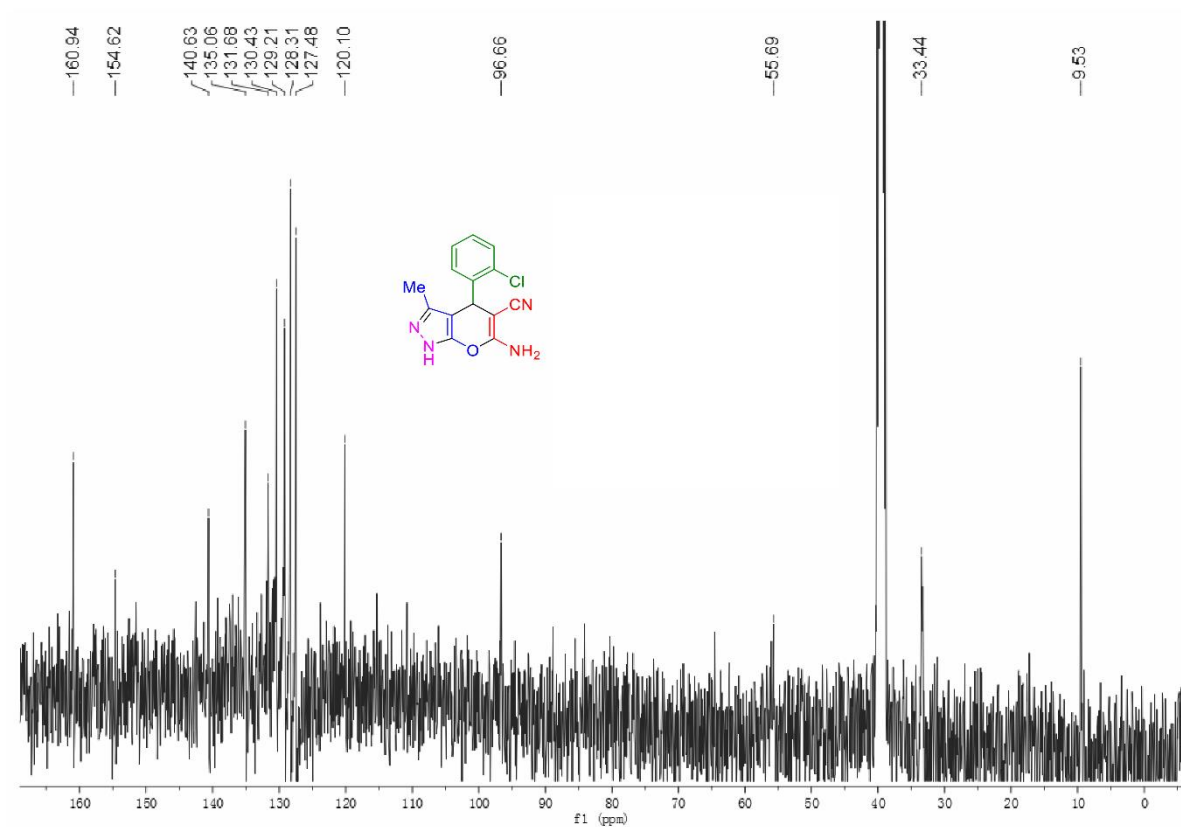

**Figure S6.** <sup>13</sup>C NMR spectra of 6-Amino-4-(2-chlorophenyl)-3-methyl-1,4-dihydropyrano[2,3-c]pyrazole-5-carbonitrile.

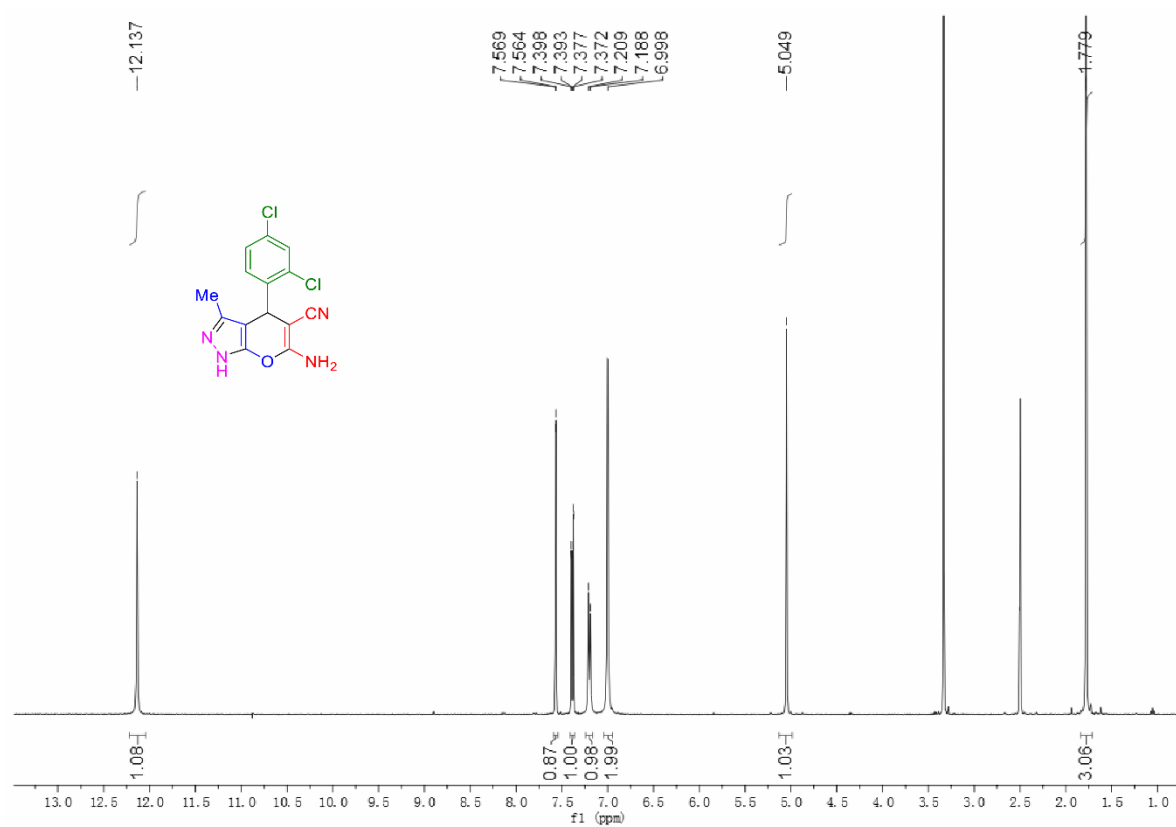

**Figure S7.** <sup>1</sup>H NMR spectra of 6-Amino-4-(2,4-dichlorophenyl)-3-methyl-2,4-dihydropyrano[2,3-c]pyrazole-5-carbonitrile.



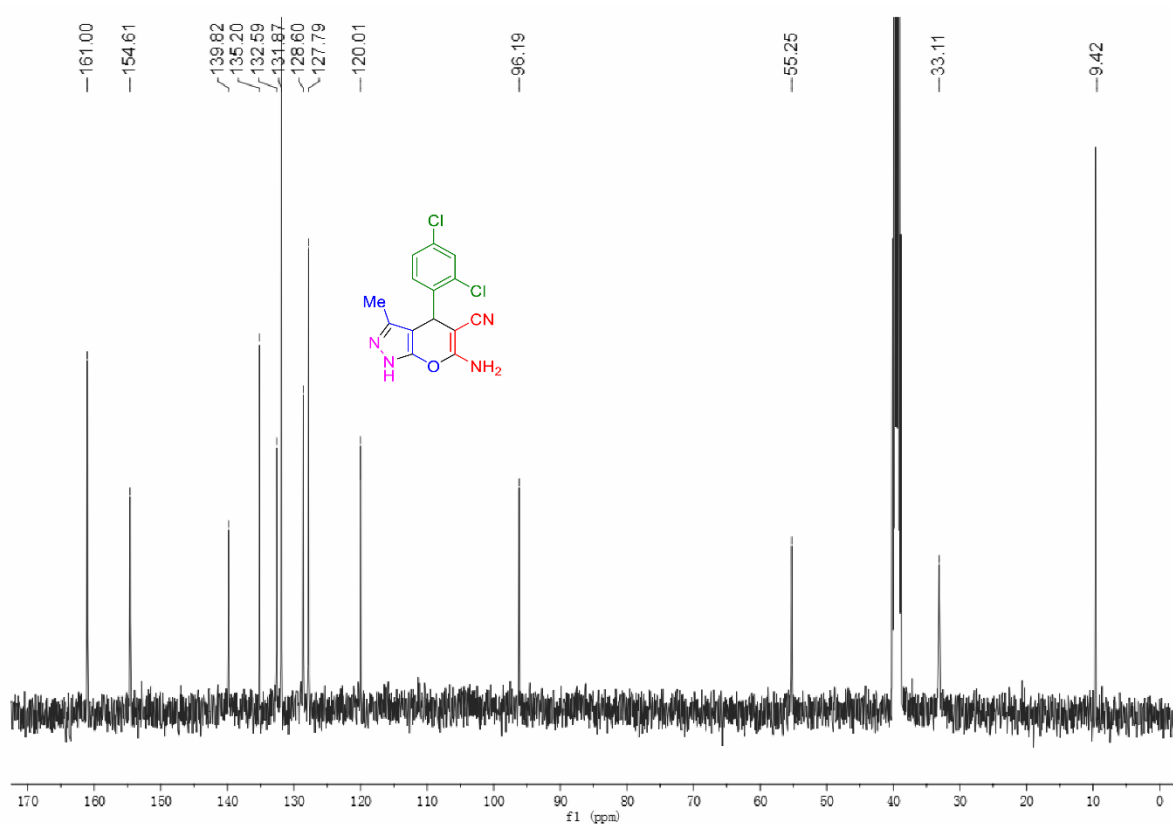

**Figure S8.**  $^{13}\text{C}$  NMR spectra of 6-Amino-4-(2,4-dichlorophenyl)-3-methyl-2,4-dihydropyrano[2,3-c]pyrazole-5-carbonitrile.

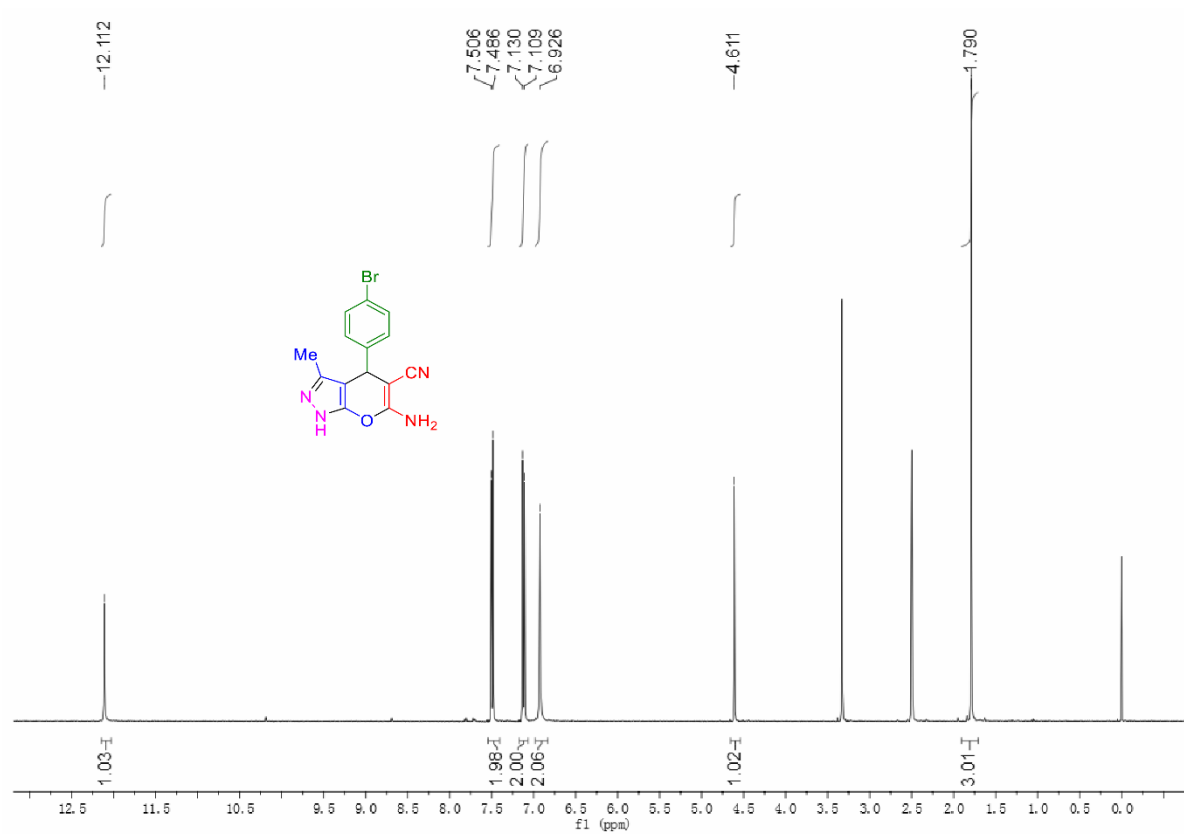

**Figure S9.** <sup>1</sup>H NMR spectra of 6-Amino-4-(4-bromophenyl)-3-methyl-1,4-dihydropyrano[2,3-c]pyrazole-5-carbonitrile.

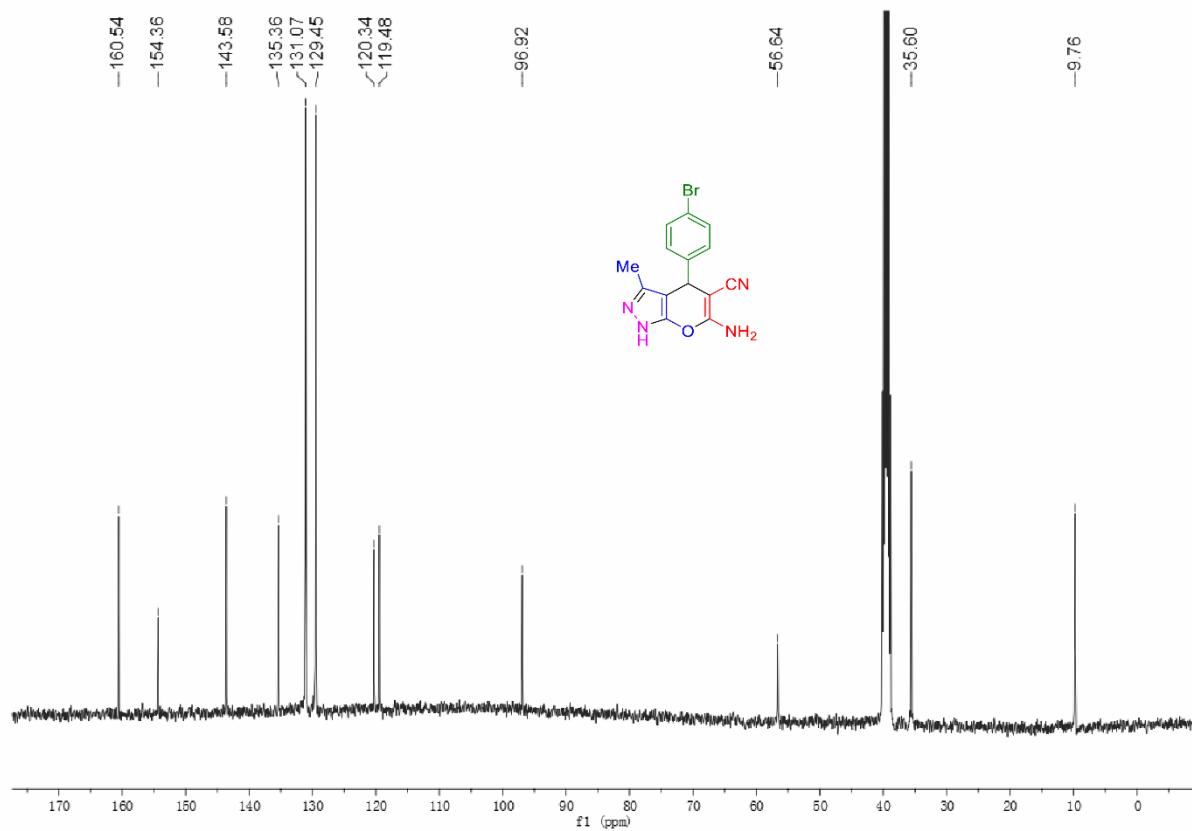

**Figure S10.**  $^{13}\text{C}$  NMR spectra of 6-Amino-4-(4-bromophenyl)-3-methyl-1,4-dihydropyrano[2,3-c]pyrazole-5-carbonitrile.

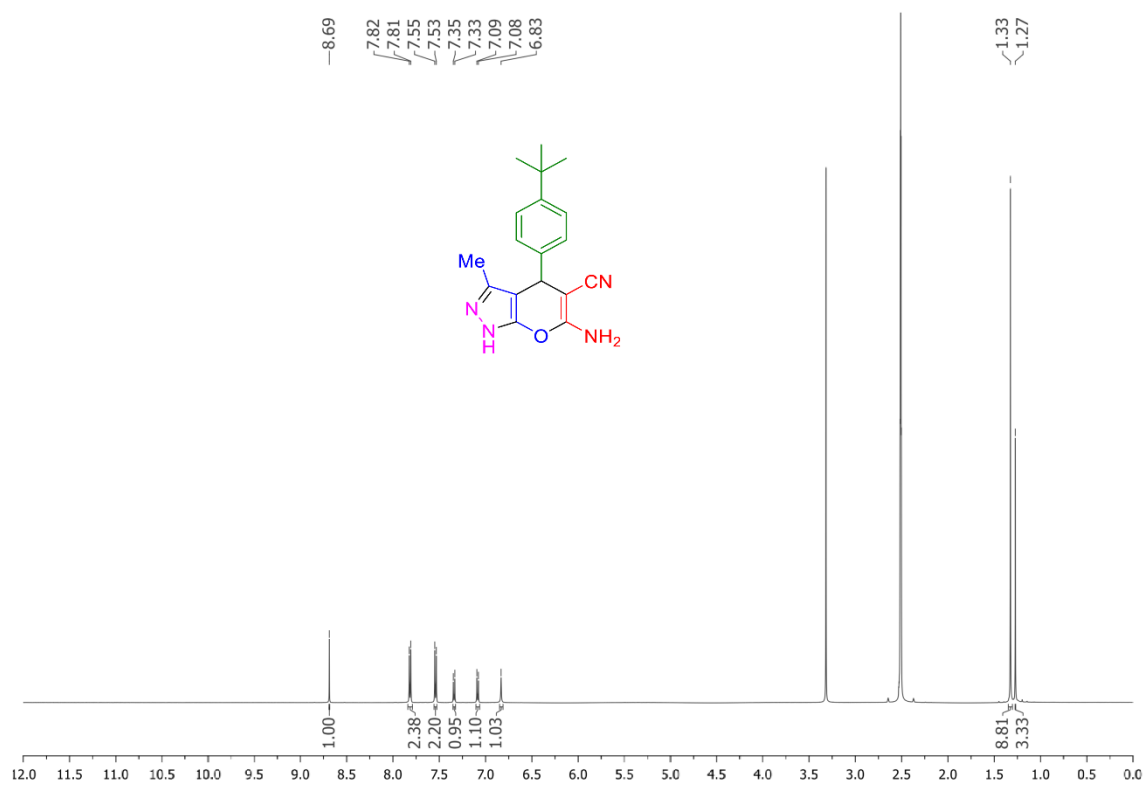

**Figure S11.** <sup>1</sup>H NMR spectra of 6-Amino-4-(4-(tert-butyl)phenyl)-3-methyl-2,4-dihydropyrano[2,3-c]pyrazole-5-carbonitrile.

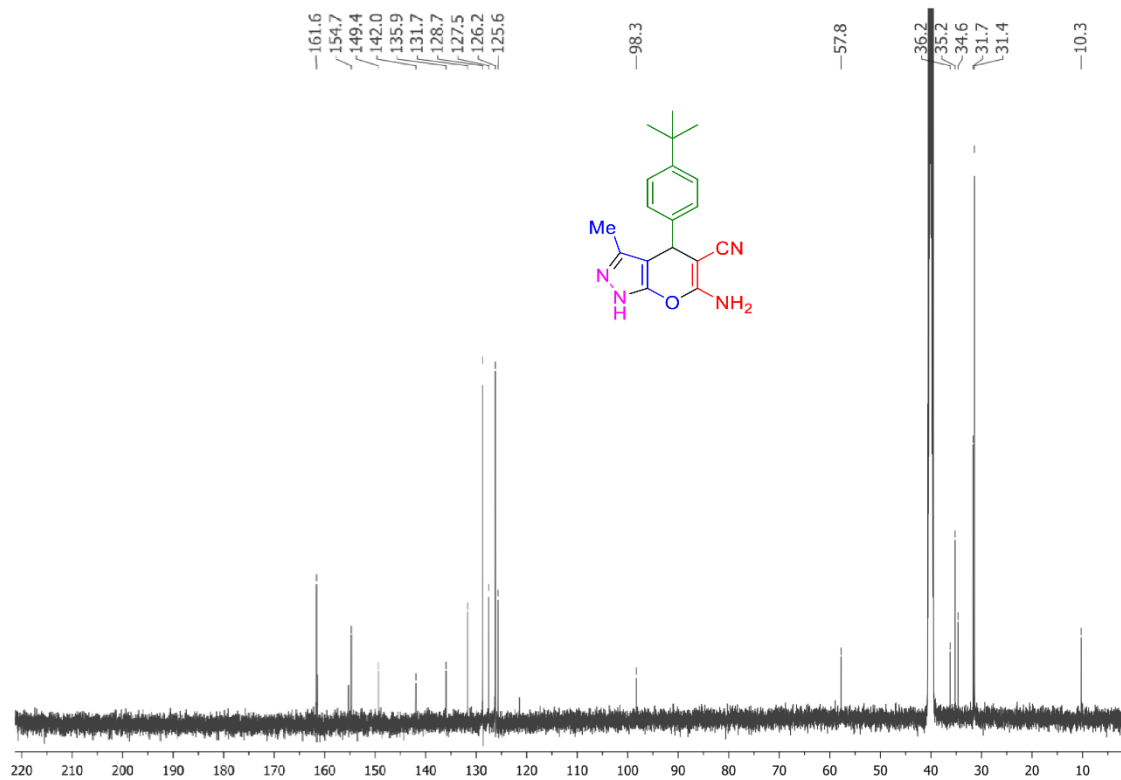

**Figure S12.** <sup>13</sup>C NMR spectra of 6-Amino-4-(4-(tert-butyl)phenyl)-3-methyl-2,4-dihydropyrano[2,3-c]pyrazole-5-carbonitrile.

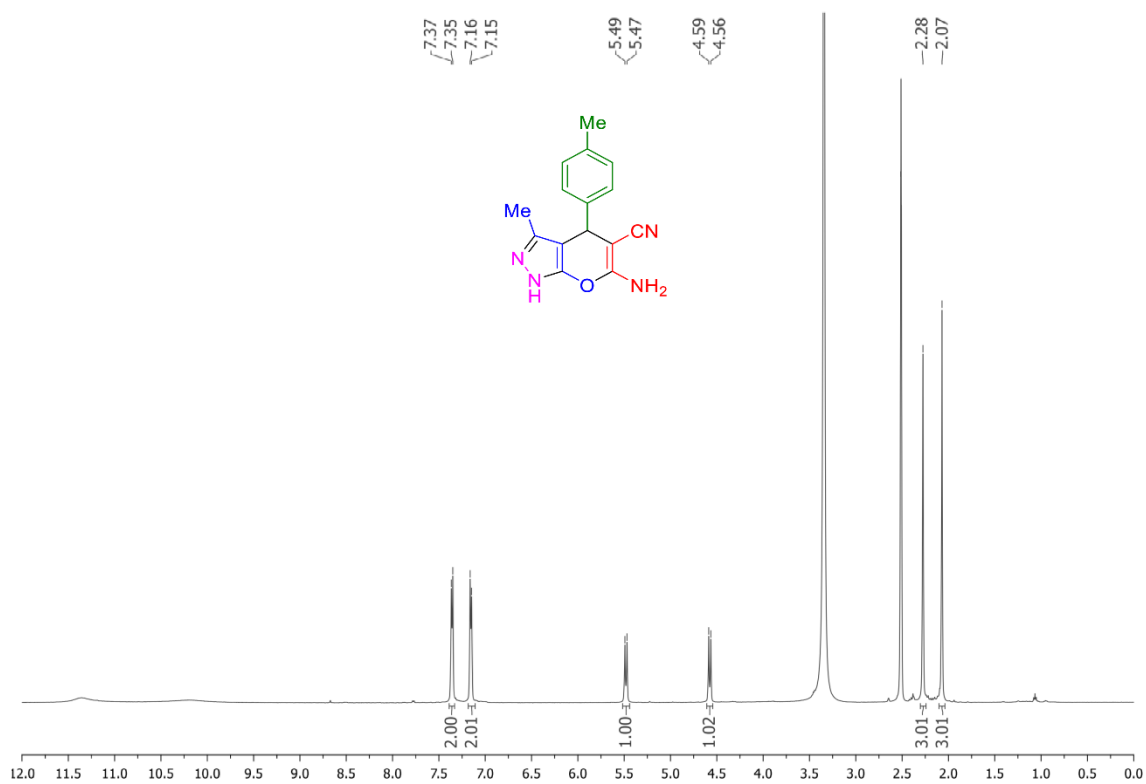

**Figure S13.** <sup>1</sup>H NMR spectra of 6-Amino-3-methyl-4-(p-tolyl)-2,4-dihydropyrano[2,3-c]pyrazole-5-carbonitrile.

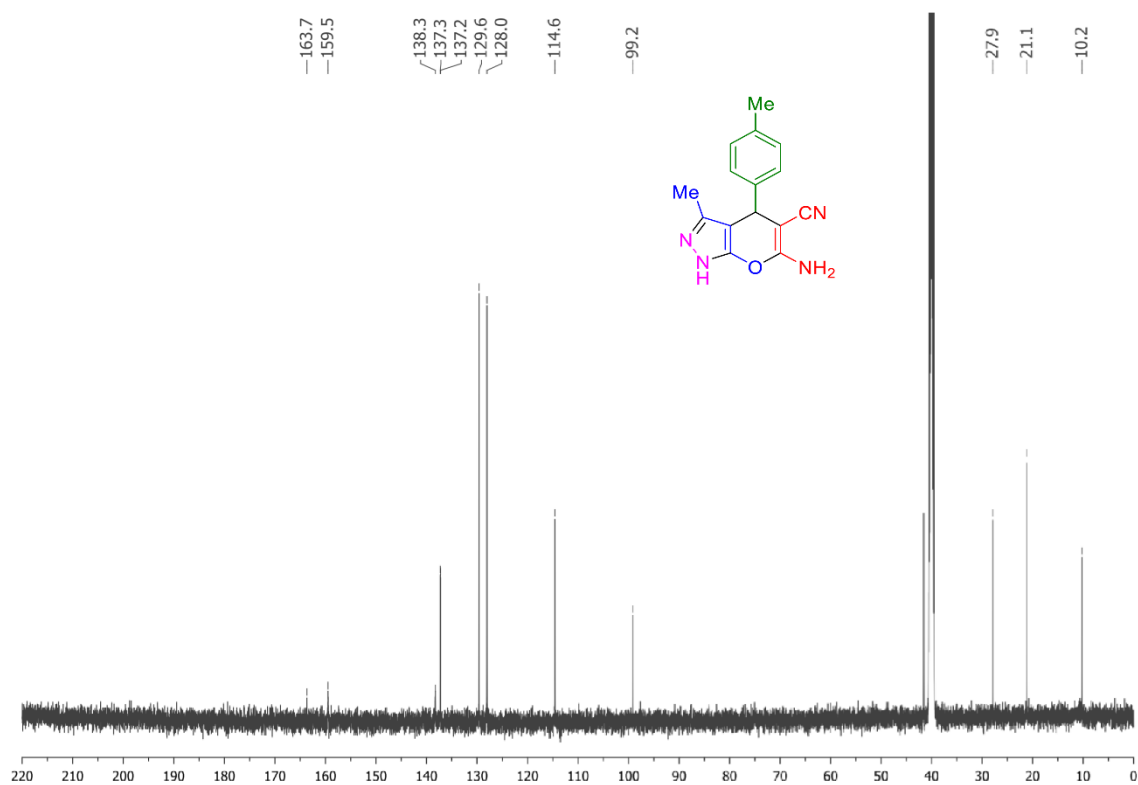

**Figure S14.**  $^{13}\text{C}$  NMR spectra of 6-Amino-3-methyl-4-(p-tolyl)-2,4-dihydropyrano[2,3-c]pyrazole-5-carbonitrile.

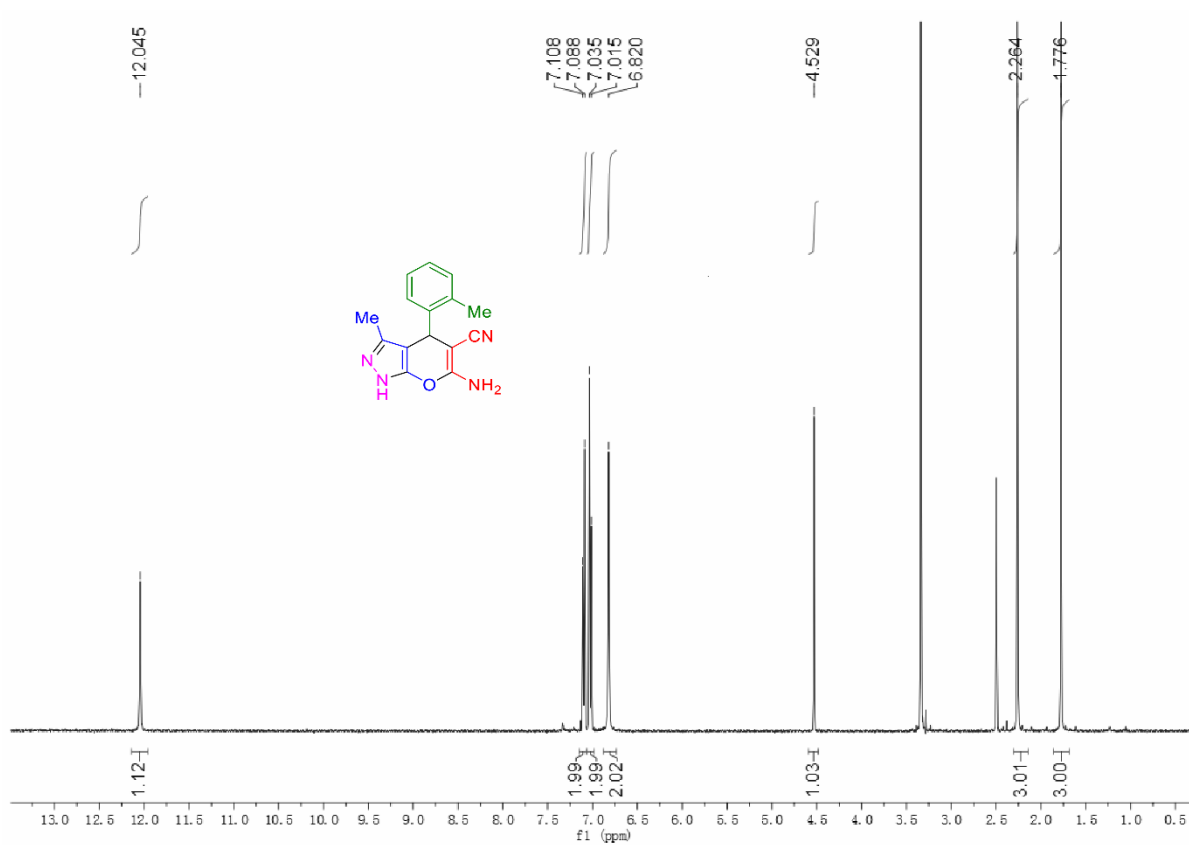

**Figure S15.** <sup>1</sup>H NMR spectra of 13C NMR spectra of 6-Amino-3-methyl-4-(*o*-tolyl)-

2,4-dihydropyrano[2,3-*c*]pyrazole-5-carbonitrile.



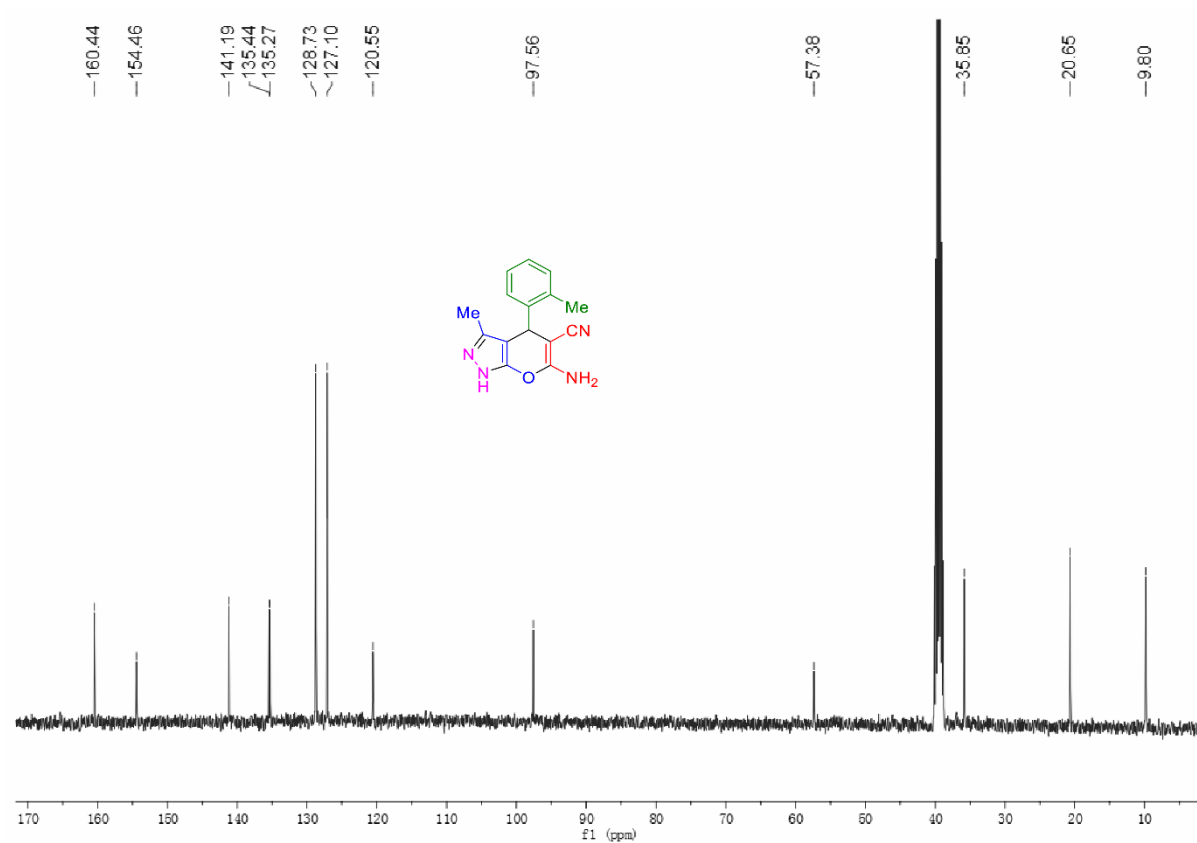

**Figure S16.**  $^{13}\text{C}$  NMR spectra of 6-Amino-3-methyl-4-(o-tolyl)-2,4-dihydropyrano[2,3-c]pyrazole-5-carbonitrile.

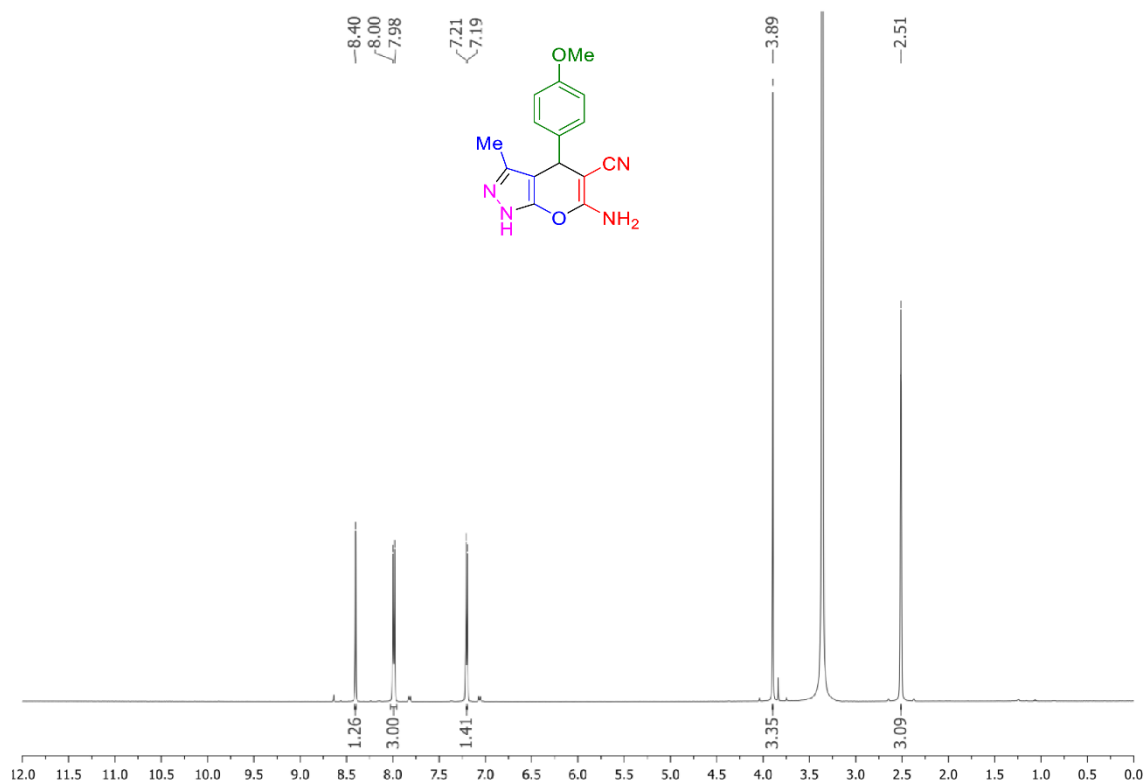

**Figure S17.** <sup>1</sup>H NMR spectra of 6-Amino-4-(4-methoxyphenyl)-3-methyl-2,4-dihydropyrano[2,3-c]pyrazole-5-carbonitrile.

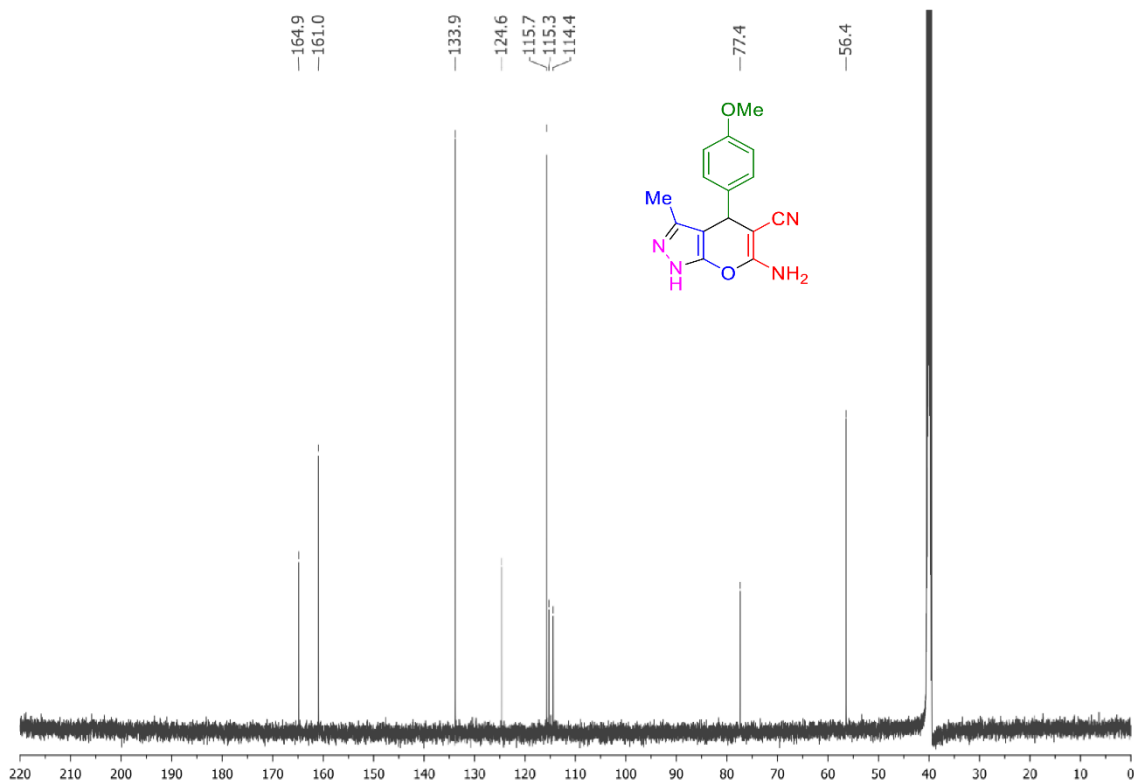

**Figure S18.**  $^{13}\text{C}$  NMR spectra of 6-Amino-4-(4-methoxyphenyl)-3-methyl-2,4-dihydropyrano[2,3-c]pyrazole-5-carbonitrile.

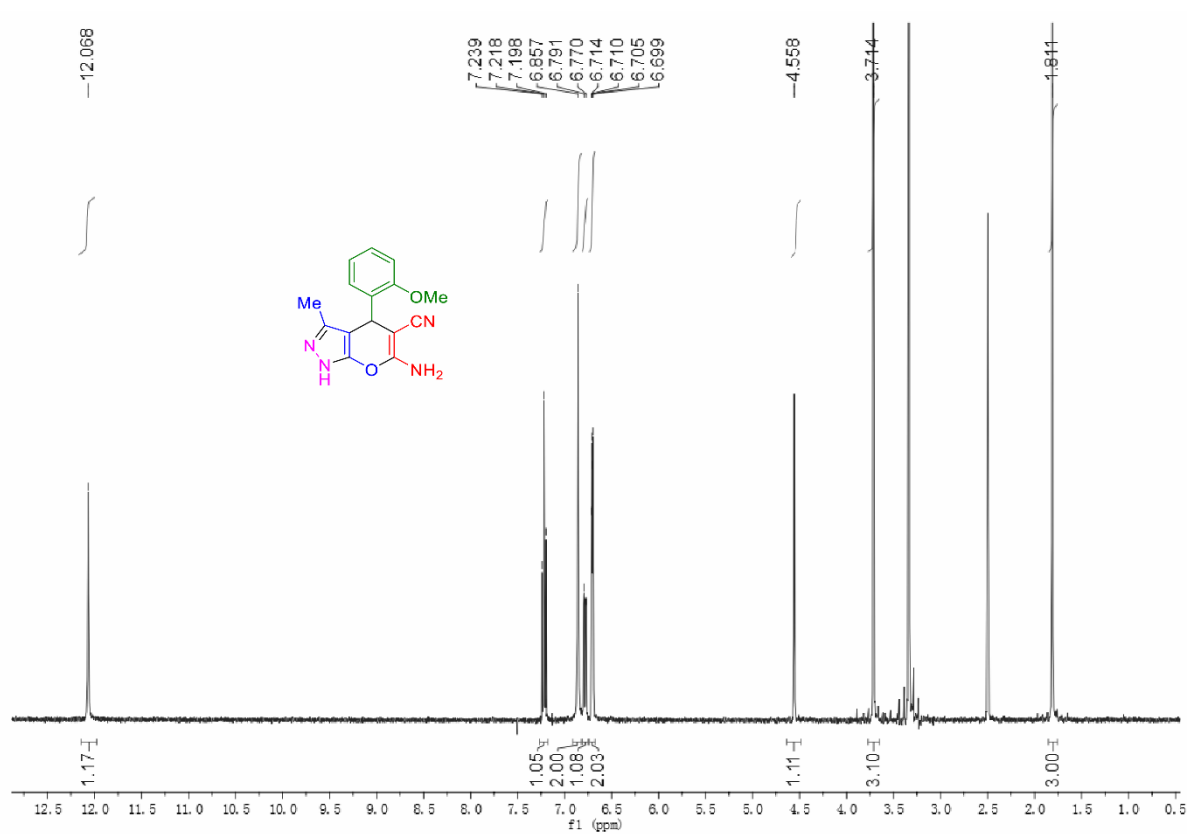

**Figure S19.**  $^1\text{H}$  NMR spectra of 6-Amino-4-(2-Methoxyphenyl)-3-methyl-2,4-dihydropyrano[2,3-c]pyrazole-5-carbonitrile.

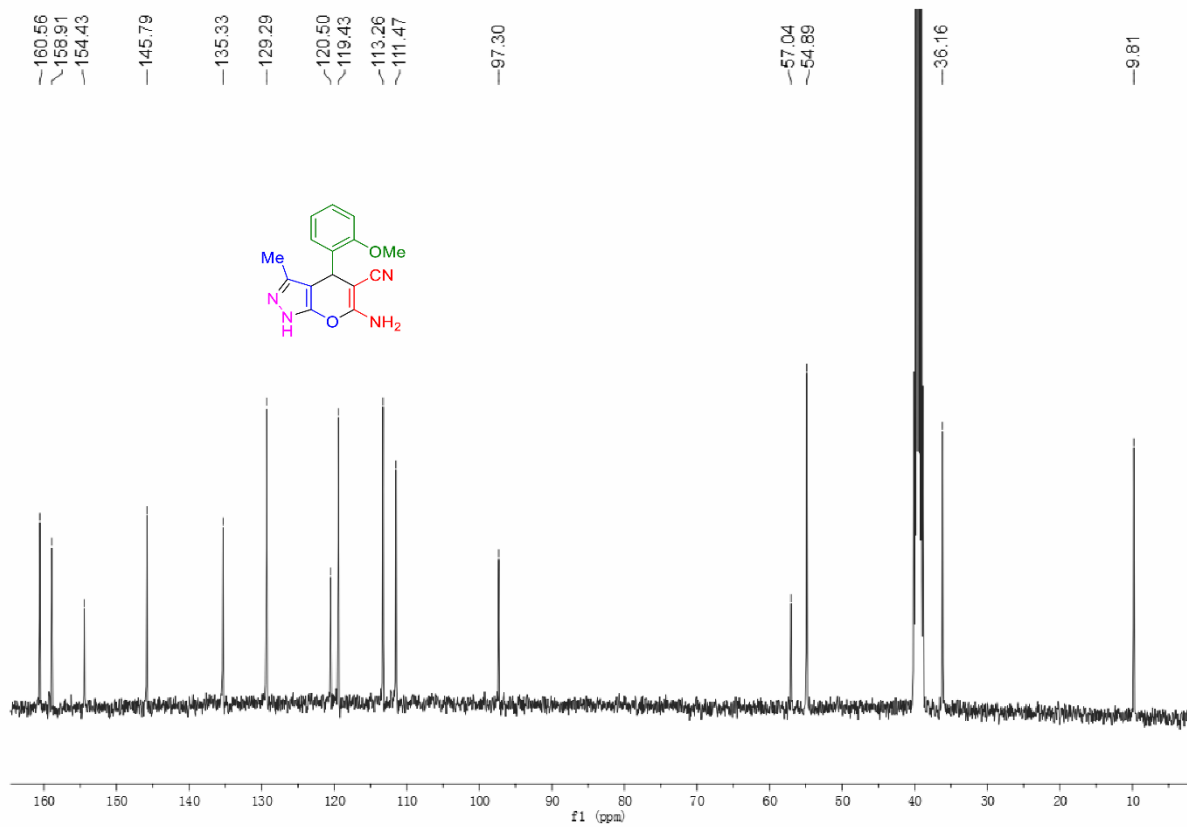

**Figure S20.**  $^{13}\text{C}$  NMR spectra of 6-Amino-4-(2-Methoxyphenyl)-3-methyl-2,4-dihydropyrano[2,3-c]pyrazole-5-carbonitrile.

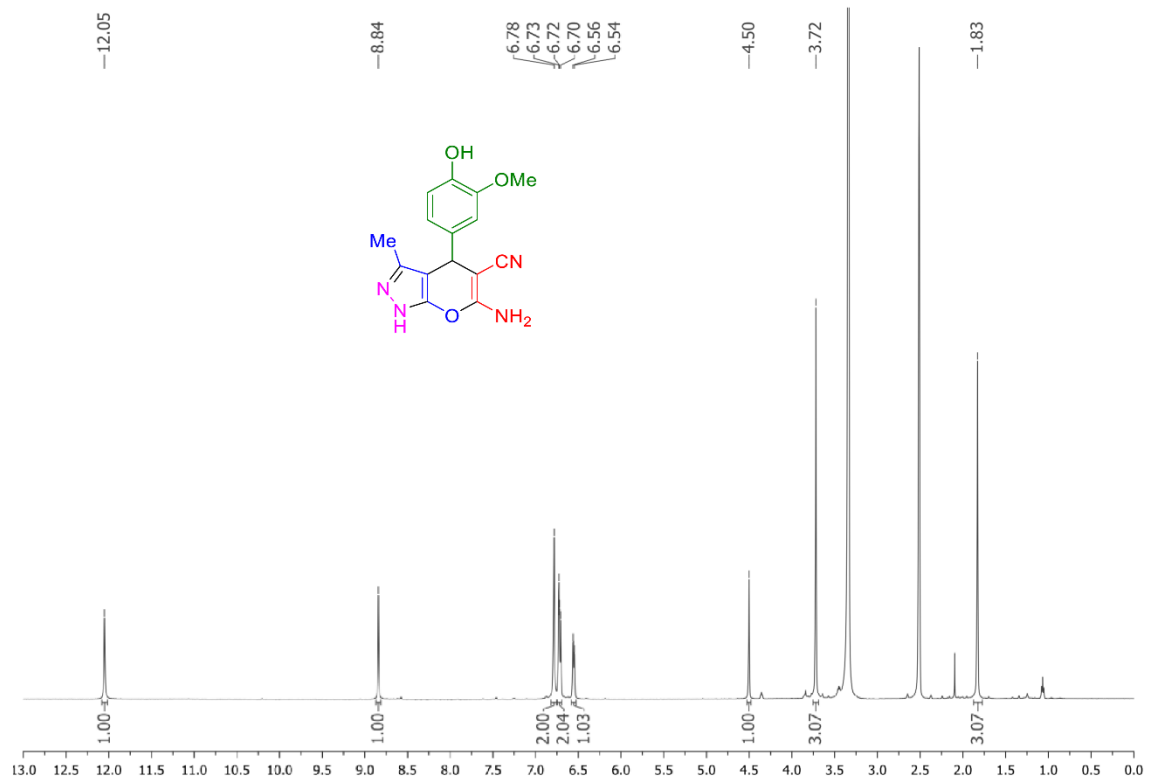

**Figure S21.** <sup>1</sup>H NMR spectra of 6-Amino-4-(4-hydroxy-3-methoxyphenyl)-3-methyl-2,4-dihydropyrano[2,3-c]pyrazole-5-carbonitrile.

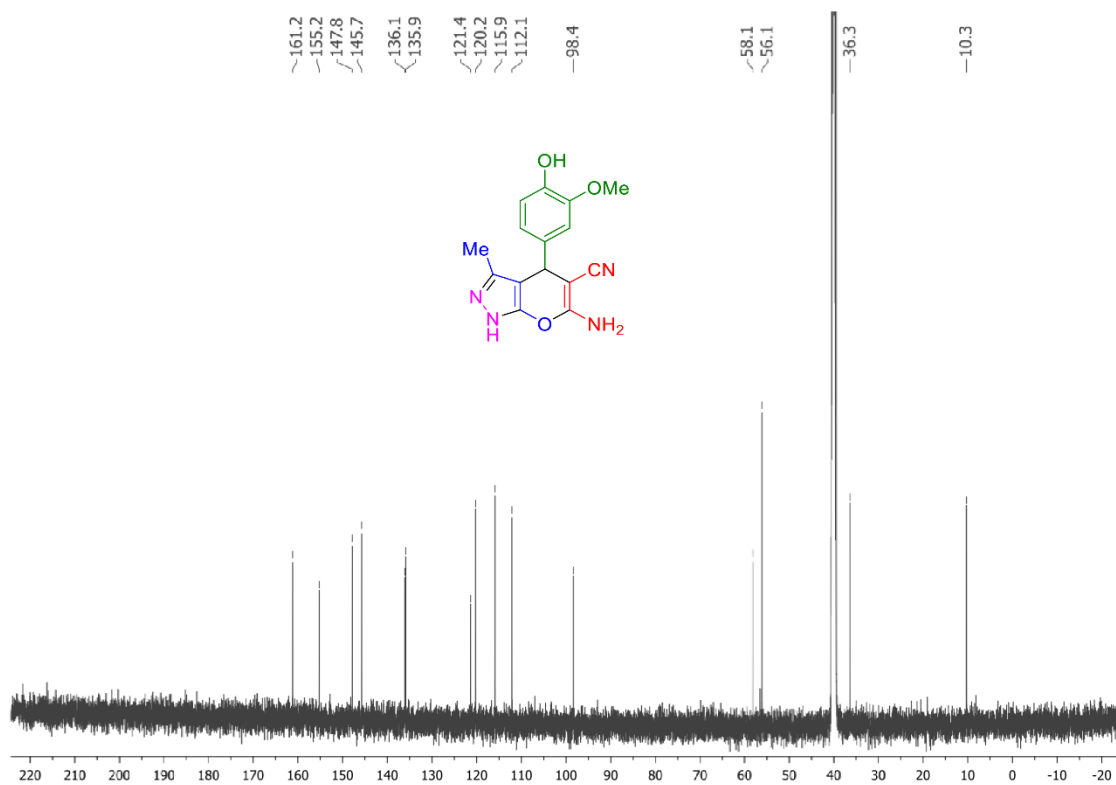

**Figure S22.**  $^{13}\text{C}$  NMR spectra of 6-Amino-4-(4-hydroxy-3-methoxyphenyl)-3-methyl-2,4-dihydropyrano[2,3-c]pyrazole-5-carbonitrile.

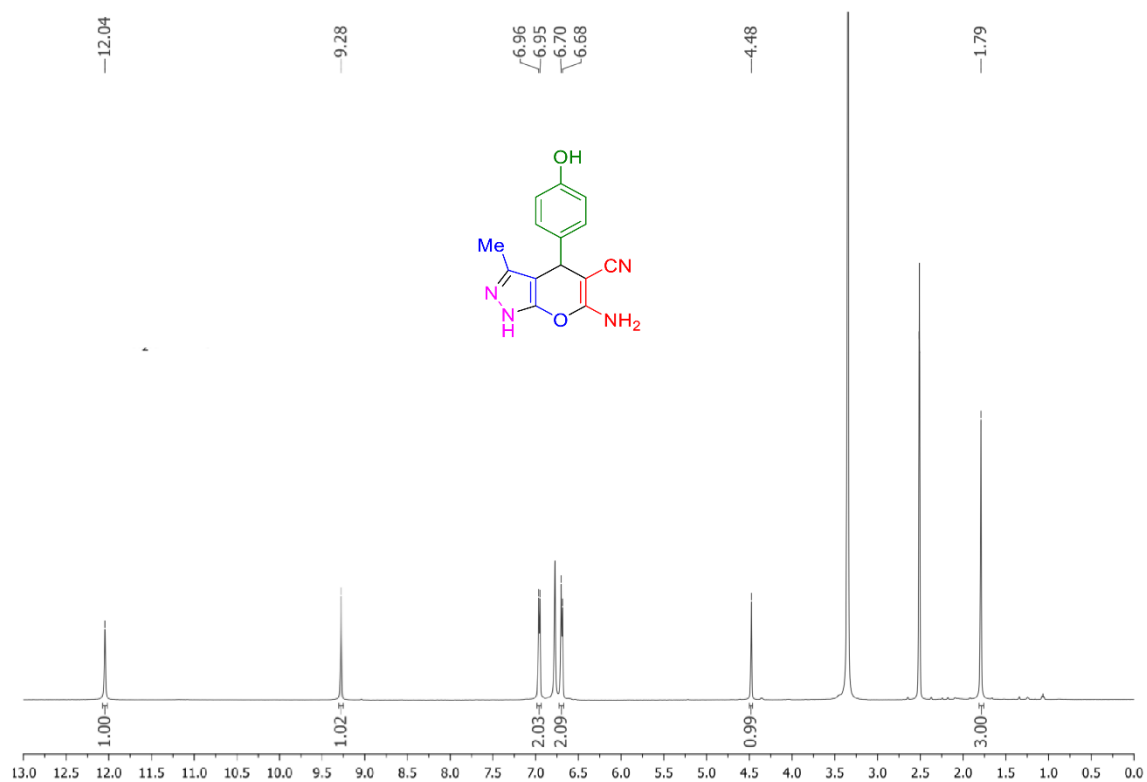

**Figure S23.** <sup>1</sup>H NMR spectra of 6-Amino-4-(4-hydroxyphenyl)-3-methyl-2,4-dihydropyrano[2,3-c]pyrazole-5-carbonitrile.



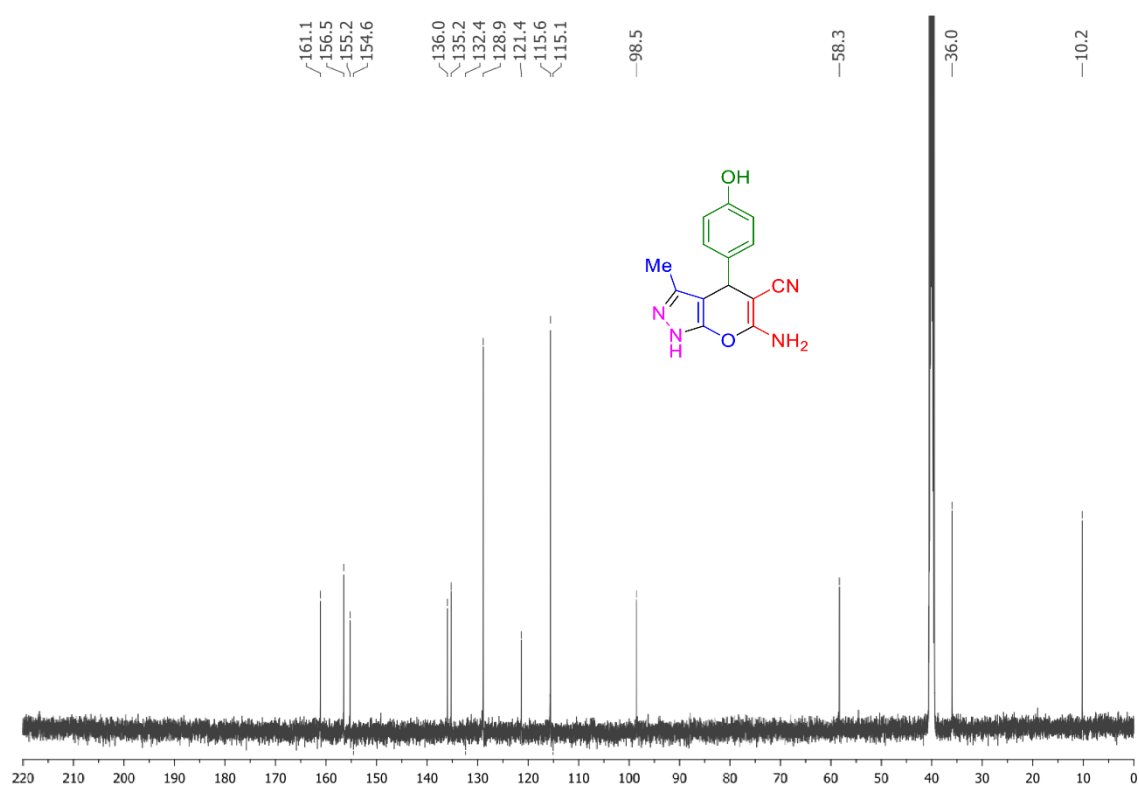

**Figure S24.**  $^{13}\text{C}$  NMR spectra of 6-Amino-4-(4-hydroxyphenyl)-3-methyl-2,4-dihydropyrano[2,3-c]pyrazole-5-carbonitrile.

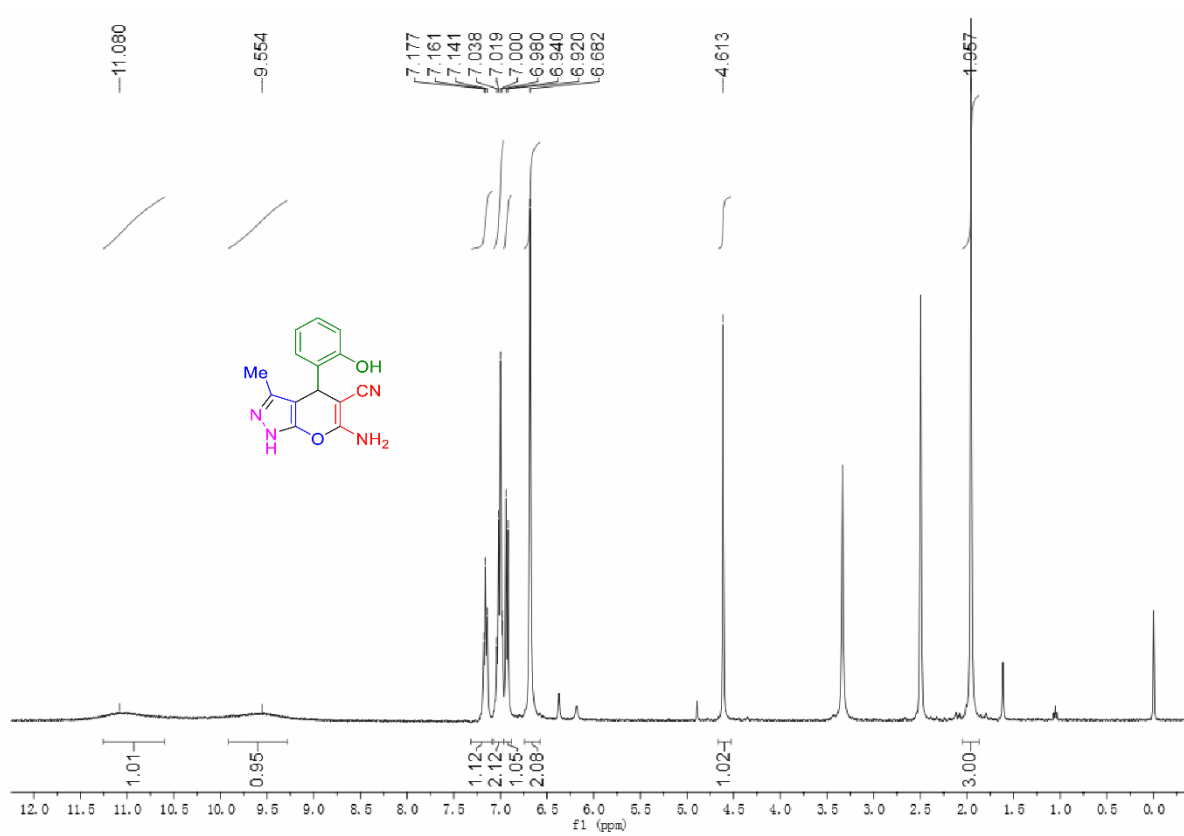

**Figure S25.** <sup>1</sup>H NMR spectra of 6-Amino-4-(2-hydroxyphenyl)-3-methyl-1,4-dihydroprano[2,3-c]pyrazole-5-carbonitrile.

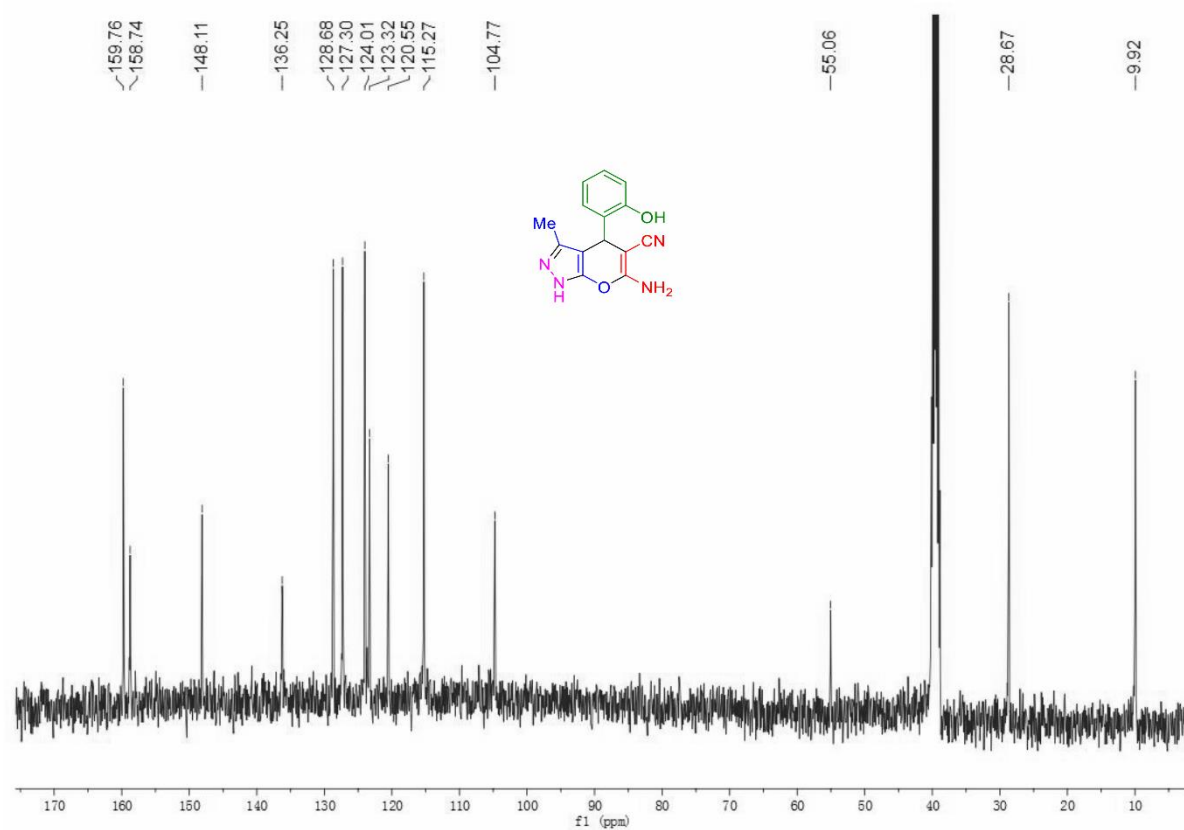

**Figure S26.**  $^{13}\text{C}$  NMR spectra of 6-Amino-4-(2-hydroxyphenyl)-3-methyl-1,4-dihydroprano[2,3-c]pyrazole-5-carbonitrile.

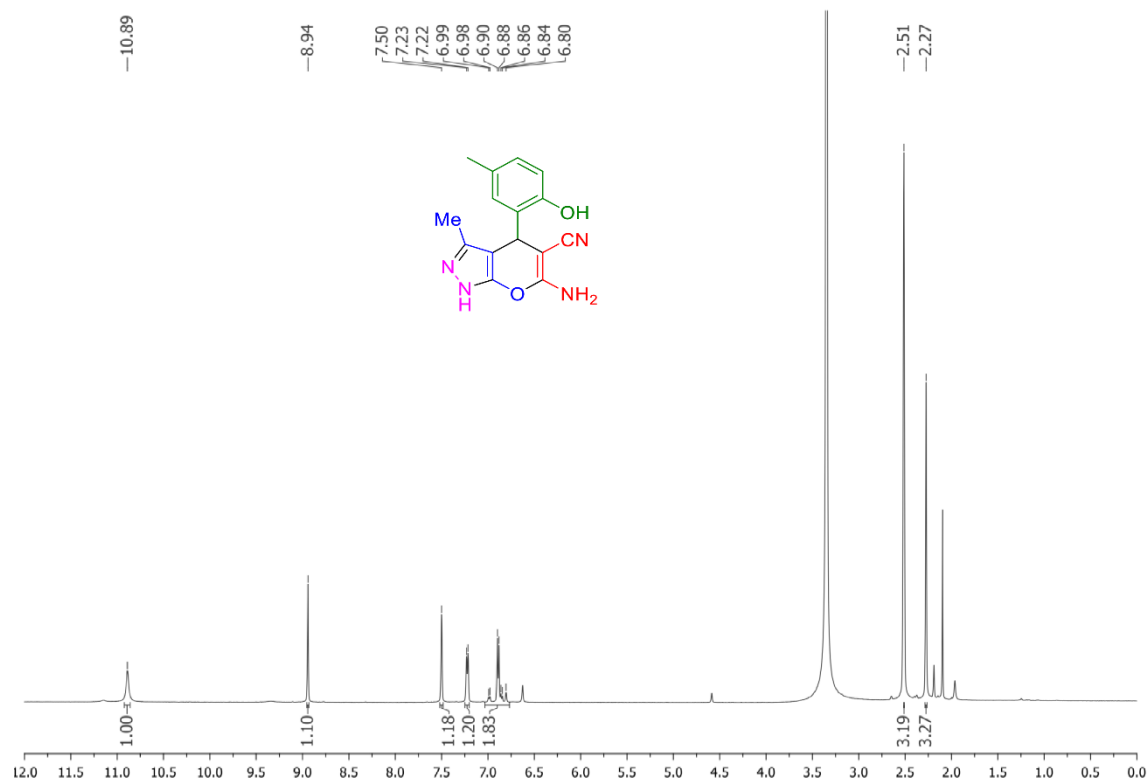

**Figure S27.** <sup>1</sup>H NMR spectra of 6-Amino-4-(2-hydroxy-5-methylphenyl)-3-methyl-2,4-dihydropyrano[2,3-c]pyrazole-5-carbonitrile.

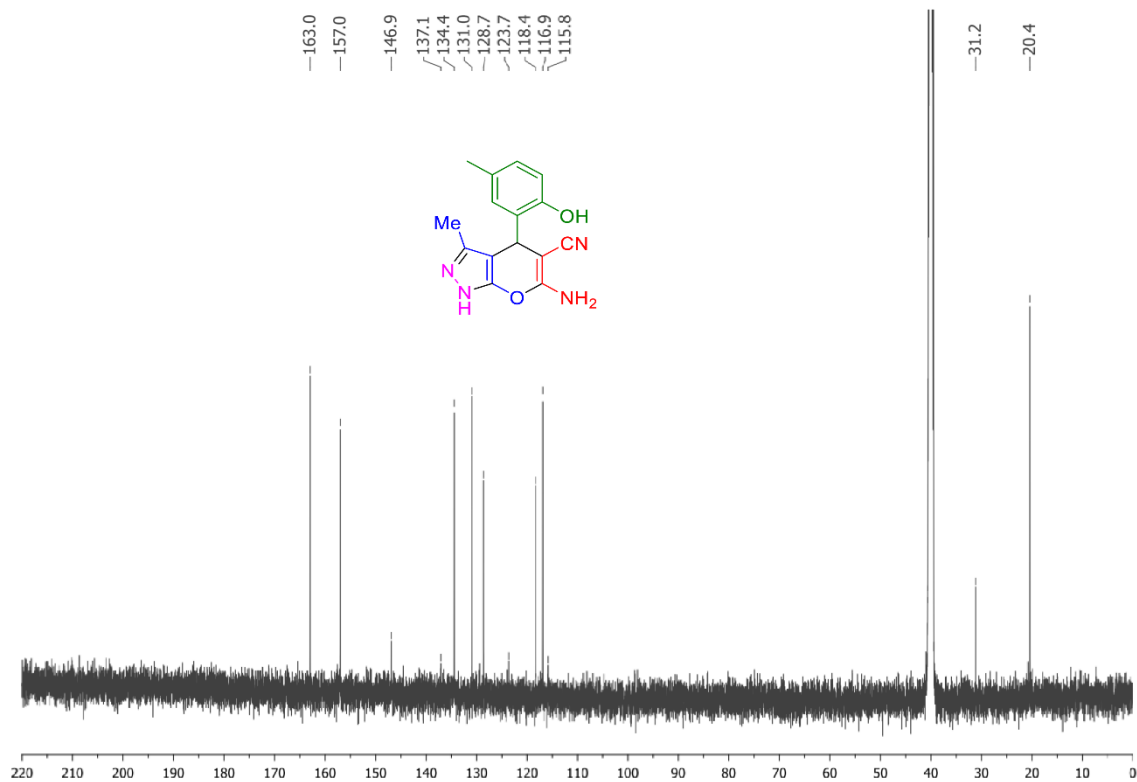

**Figure S28.** <sup>13</sup>C NMR spectra of 6-Amino-4-(2-hydroxy-5-methylphenyl)-3-methyl-2,4-dihydropyrano[2,3-c]pyrazole-5-carbonitrile.

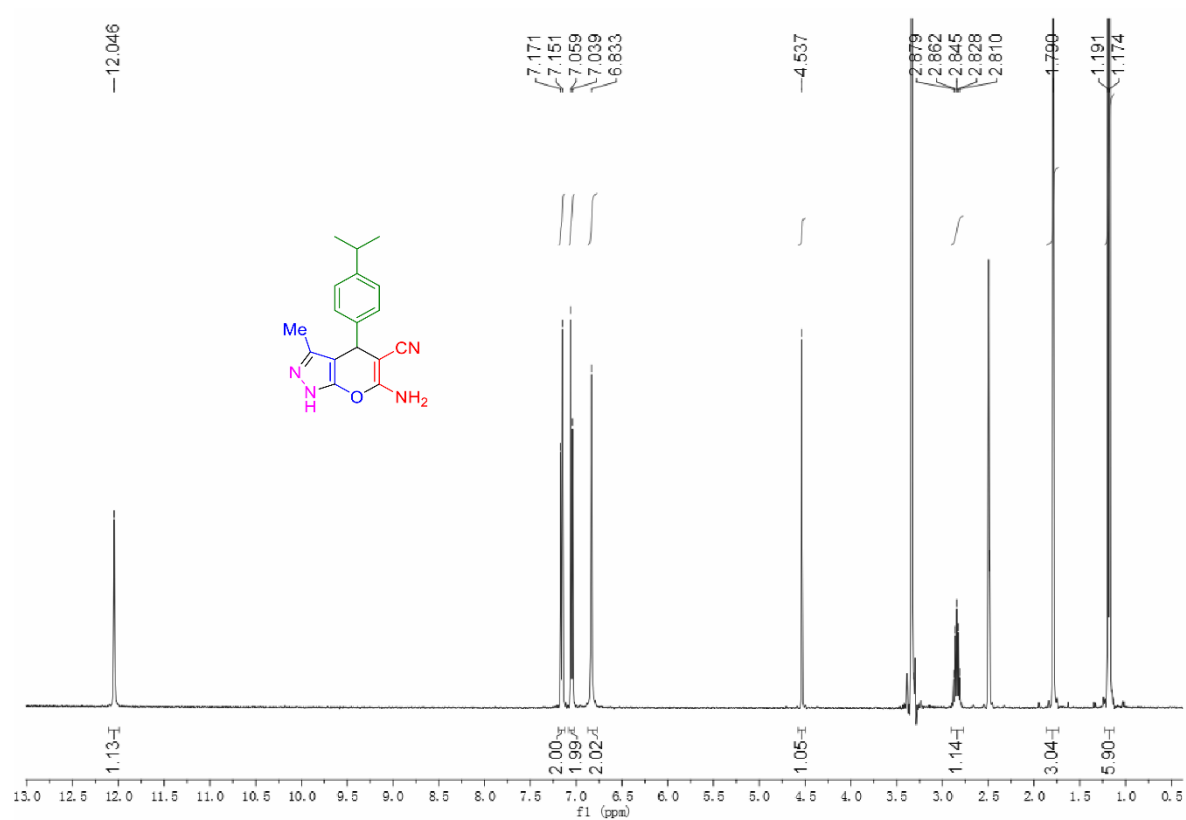

**Figure S29.** <sup>1</sup>H NMR spectra of 6-Amino-4-(4-isopropylphenyl)-3-methyl-2,4-dihydroprano[2,3-c]pyrazole-5-carbonitrile.

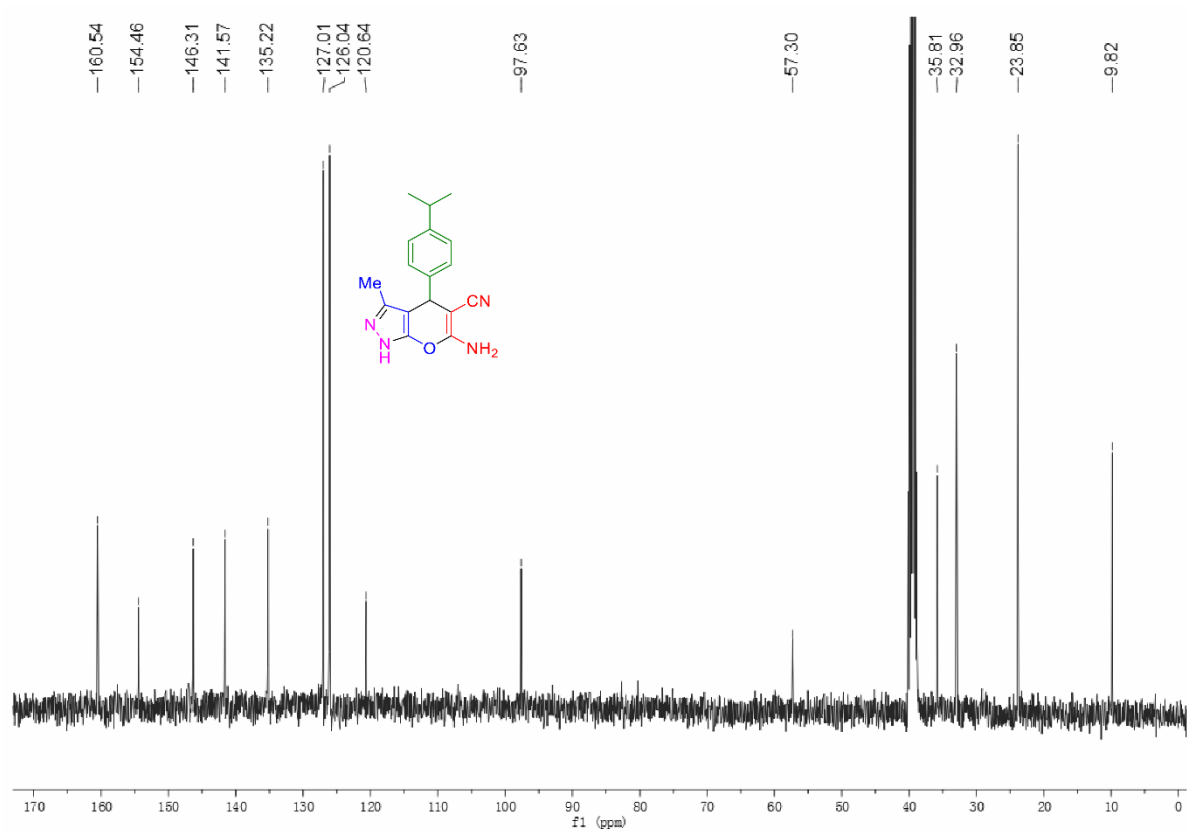

**Figure S30.**  $^{13}\text{C}$  NMR spectra of 6-Amino-4-(4-isopropylphenyl)-3-methyl-2,4-dihydropyrano[2,3-c]pyrazole-5-carbonitrile.

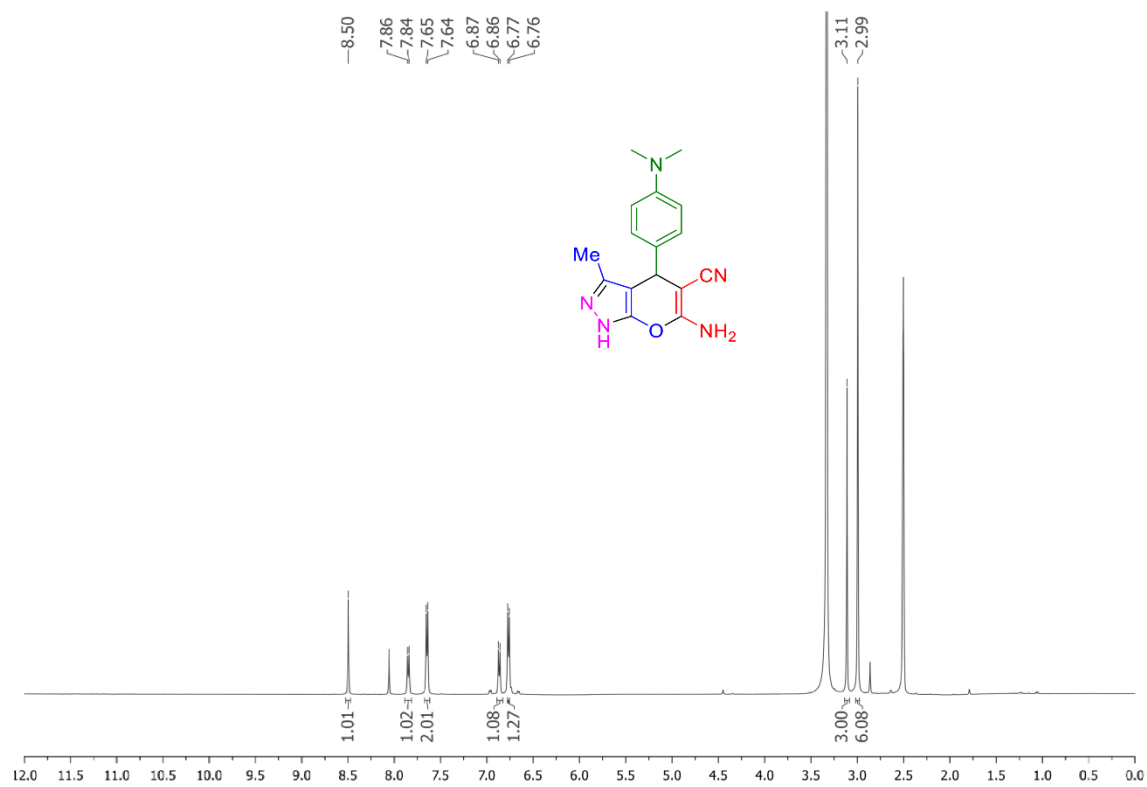

**Figure S31.** <sup>1</sup>H NMR spectra of 6-Amino-4-(4-(dimethylamino)phenyl)-3-methyl-2,4-dihydroprano[2,3-c]pyrazole-5-carbonitrile.



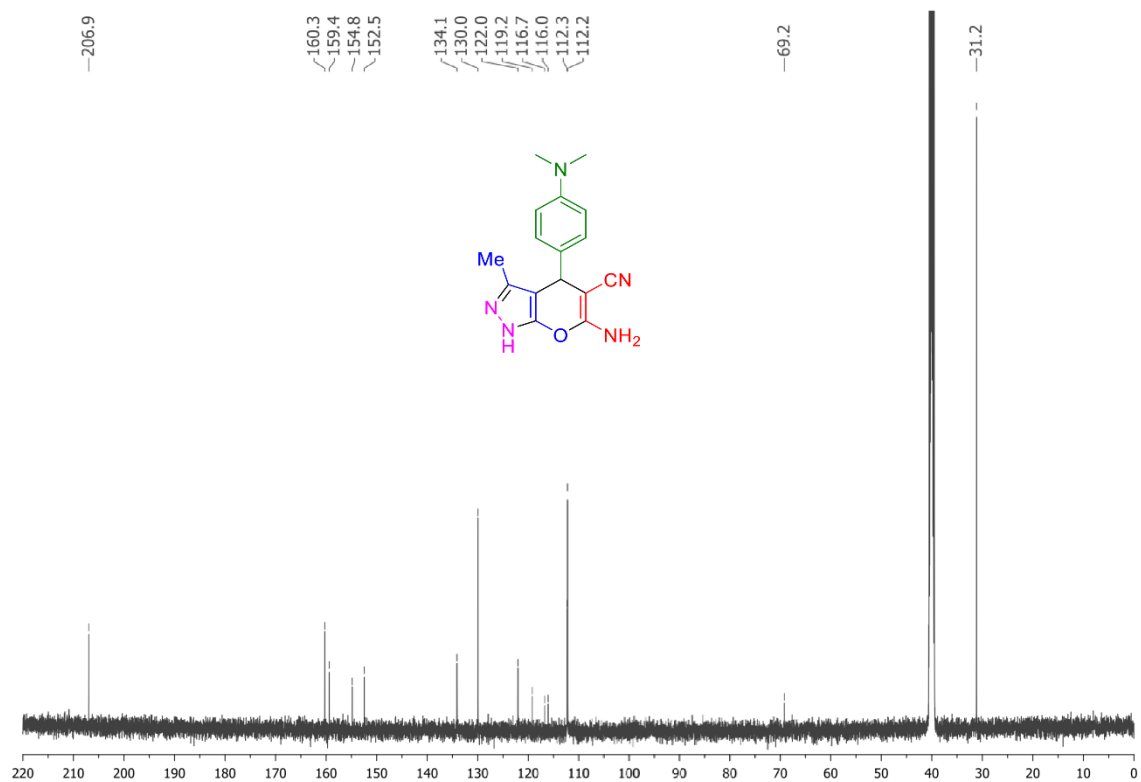

**Figure S32.**  $^{13}\text{C}$  NMR spectra of 6-Amino-4-(4-(dimethylamino)phenyl)-3-methyl-2,4-dihydropyrano[2,3-c]pyrazole-5-carbonitrile.

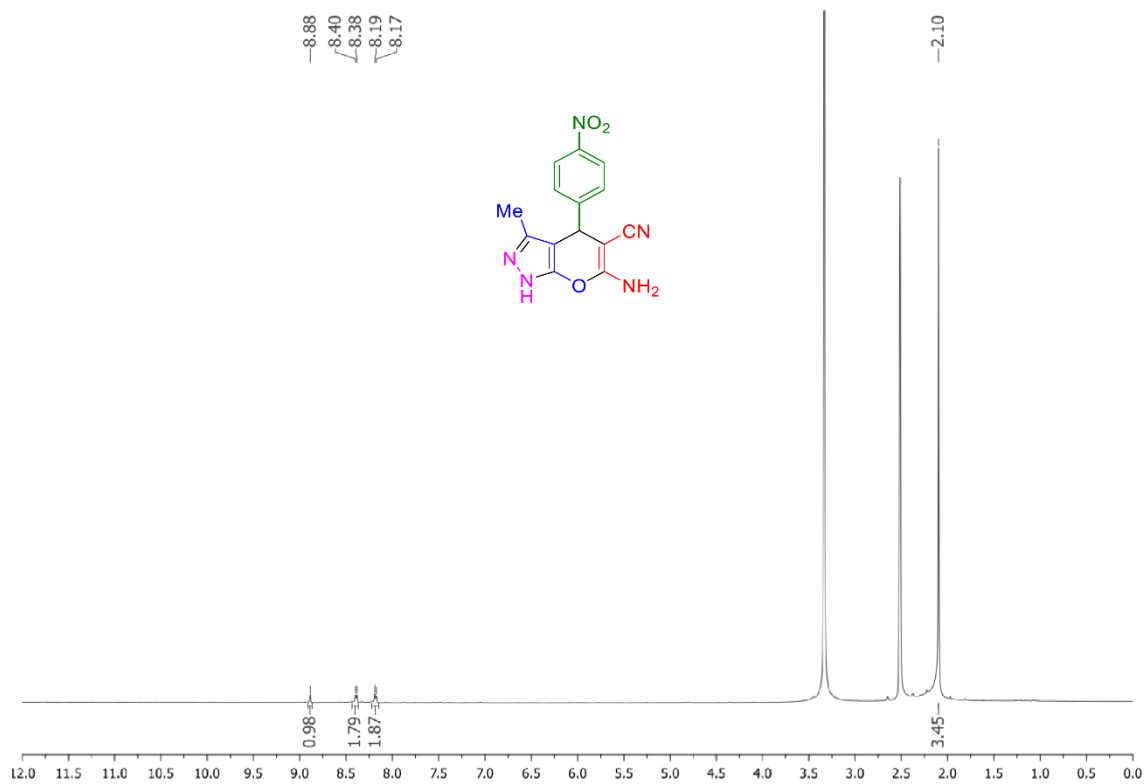

**Figure S33.** <sup>1</sup>H NMR spectra of 6-Amino-4-(4-hydroxyphenyl)-3-methyl-2,4-dihydropyrano[2,3-c]pyrazole-5-carbonitrile.

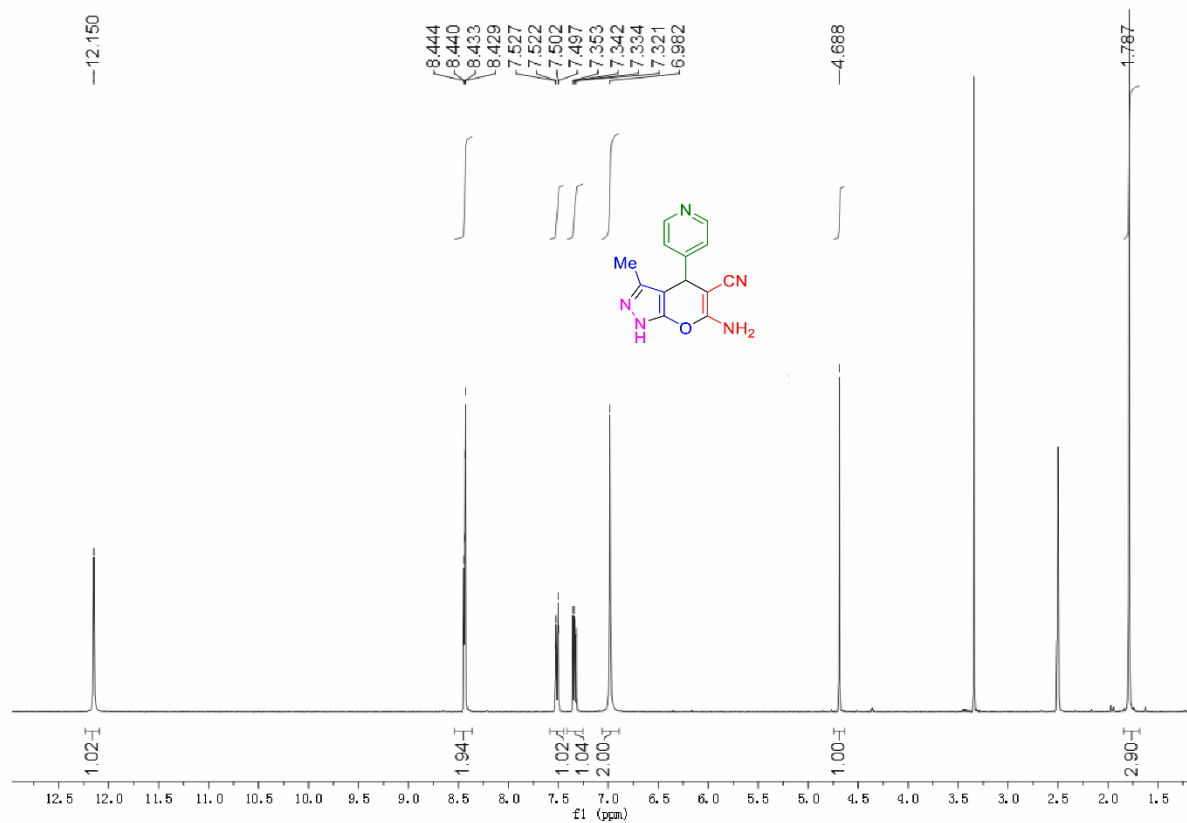

**Figure S34.** <sup>1</sup>H NMR spectra of 6-Amino-4-(pyridine-4-yl)-3-methyl-2,4-dihydropyrano[2,3-c]pyrazole-5-carbonitrile.

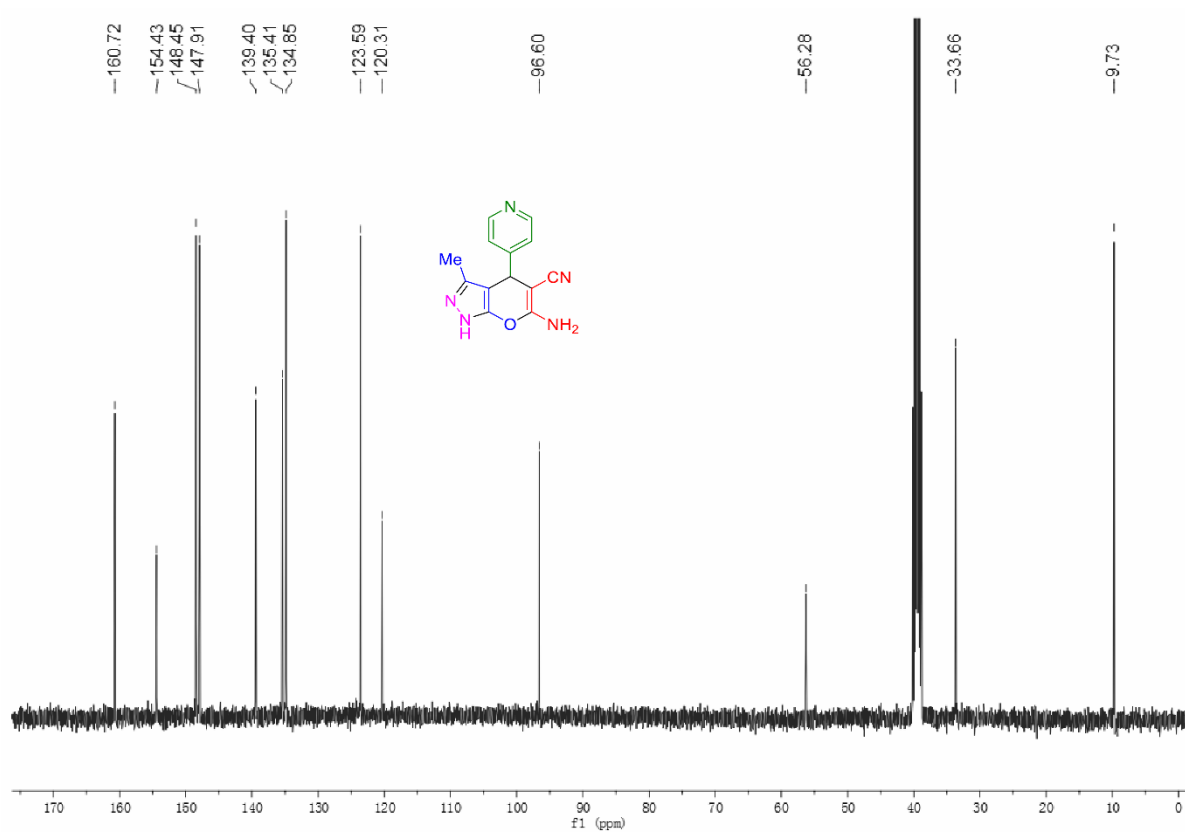

**Figure S35.** <sup>13</sup>C NMR spectra of 6-Amino-4-(pyridine-4-yl)-3-methyl-2,4-dihydropyrano[2,3-c]pyrazole-5-carbonitrile.

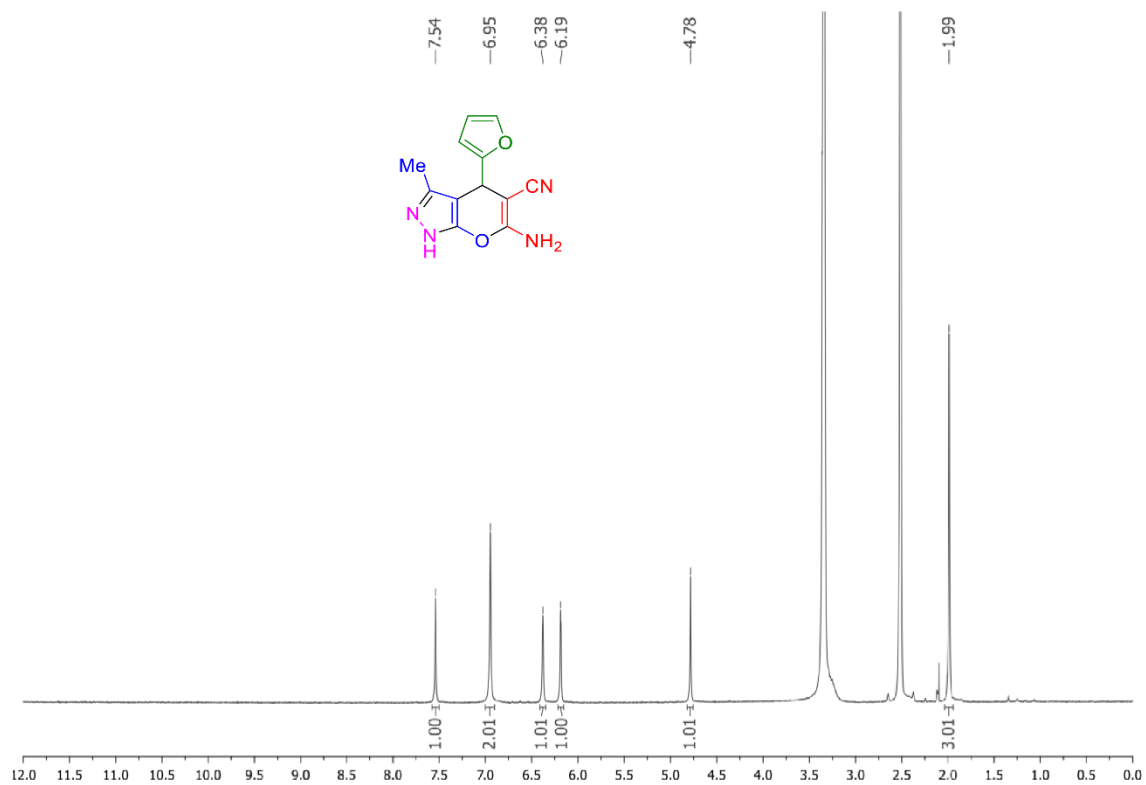

**Figure S36.** <sup>1</sup>H NMR spectra of 6-Amino-4-(furan-2-yl)-3-methyl-2,4-dihydropyrano[2,3-c]pyrazole-5-carbonitrile.

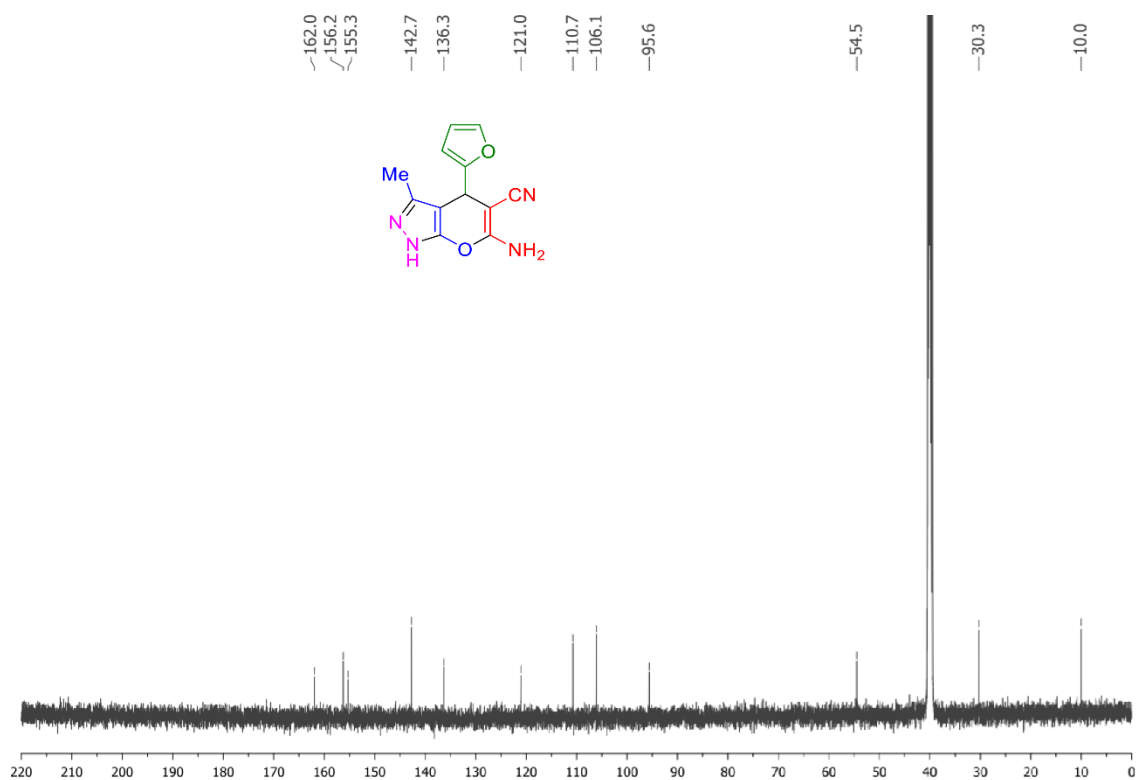

**Figure S37.**  $^{13}\text{C}$  NMR spectra of 6-Amino-4-(furan-2-yl)-3-methyl-2,4-dihydropyrano[2,3-c]pyrazole-5-carbonitrile.

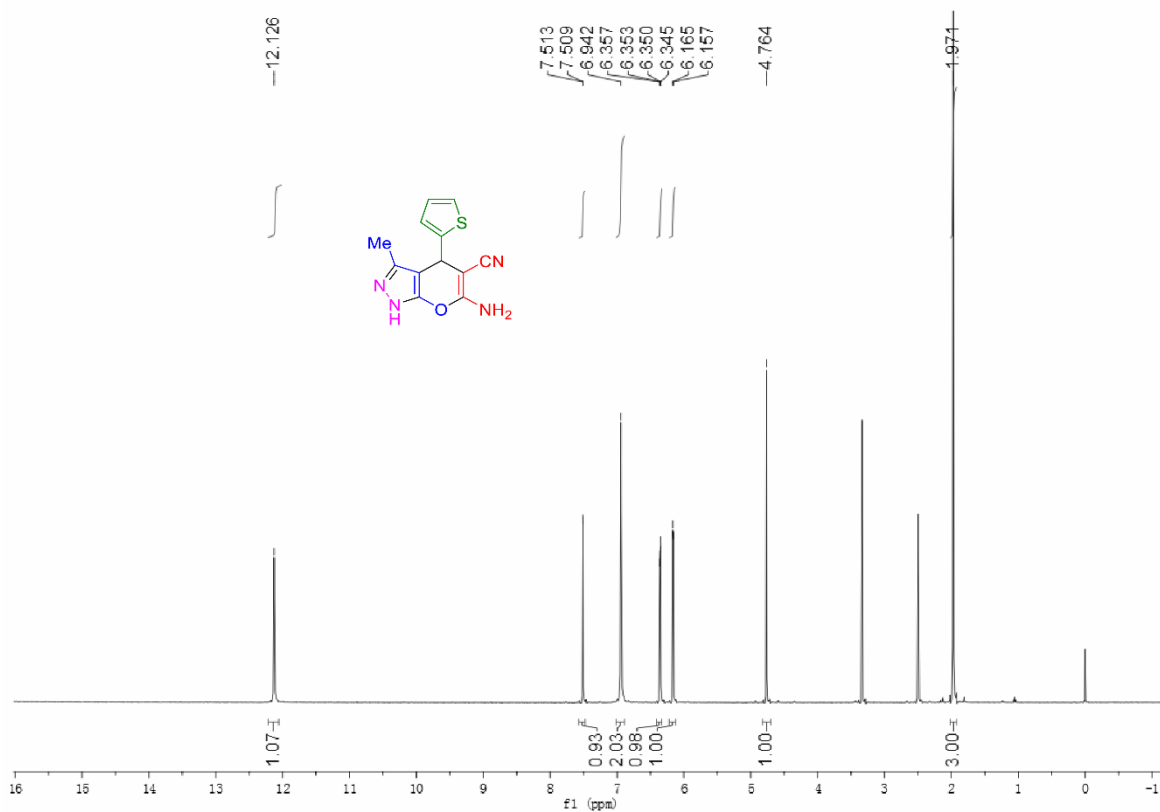

**Figure S38.**  $^1\text{H}$  NMR spectra of 6-Amino-4-(thiophene-2-yl)-3-methyl-2,4-dihydropyrano[2,3-c]pyrazole-5-carbonitrile.

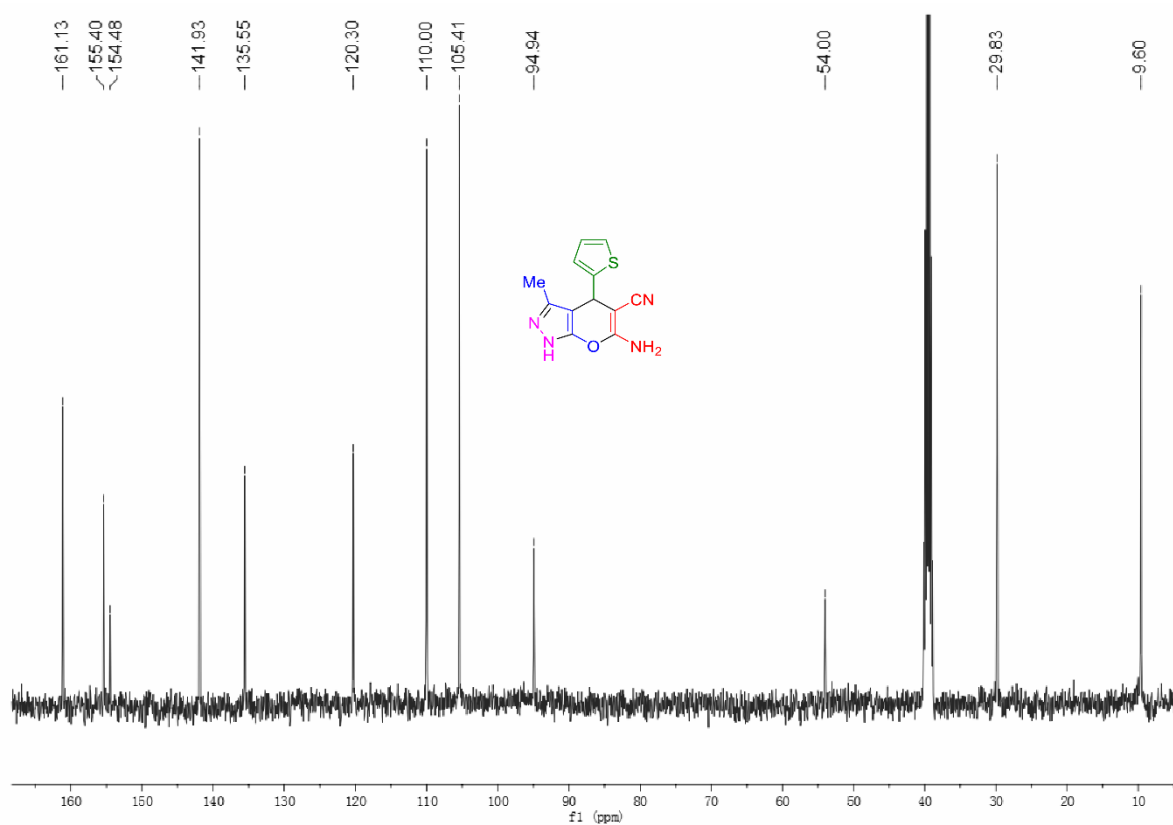

**Figure S39.** <sup>13</sup>C NMR spectra of 6-Amino-4-(thiophene-2-yl)-3-methyl-2,4-dihydropyrano[2,3-c]pyrazole-5-carbonitrile.
